# Supplementary material for: Allele-specific genome editing using CRISPR–Cas9 is associated with loss of heterozygosity in diploid yeast
Source: PubMed Central journal article supplement — Nucleic Acids Res. 2018 Dec 5;47(3):1362–72. doi: 10.1093/nar/gky1216 (PMC6379674; doi:10.1093/nar/gky1216), 2018-12-05
Supplement: gky1216_supplemental_files.pdf [file gky1216_supplemental_files.pdf]

## **Supplementary Data File**

Of the manuscript

**Allele-specific genome editing using CRISPR-Cas9 causes off-target mutations  
in diploid yeast**

**Figure S1: Whole genome sequencing coverage plots of *S. cerevisiae* x *eubayanus* hybrid IMS0408 before and after targeting the *S. cerevisiae* specific gene *MAL11*.** Genomic DNA was extracted from untransformed IMS0408 and from four randomly selected isolates obtained after attempting the deletion of *MAL11* using Cas9 and a 120 bp repair fragment, called IMX1421 to IMX1424. Whole genome sequencing was performed using 150 bp paired-end reads on an Illumina HiSeq 2500, and the reads were aligned to reference genome composed of chromosome-level assemblies of *S. cerevisiae* strain CEN.PK113-7D and of *S. eubayanus* strain CBS12357 obtained using nanopore sequencing. On the graphs the local sequencing coverage across all contigs is shown by black dots and the median coverage is shown by a black line. While in IMS0408, the coverage of all chromosomes is approximately equal, IMX1421-1424 show no coverage on regions of *S. cerevisiae* chromosome VII including *MAL11* (1,100,203-1,102,053), and double coverage on the corresponding regions of *S. eubayanus* chromosome VII. The coordinates at which the coverage on *S. cerevisiae* chromosome VII disappeared were verified using IGV software: around 1,094,000 for IMX1421, 768, 000 for IMX1422, 968,300 for IMX1423 and 767,000 for IMX1424. In all cases, coverage increased on the corresponding region of *S. eubayanus* chromosome VII and read pairing indicated the duplicated segment of *S. eubayanus* chromosome VII was attached to the remaining segment of *S. cerevisiae* chromosome VII. In the case of IMX1422, the *S. cerevisiae* and *S. eubayanus* chromosomes merged into two copies of a chimeric chromosome, while for the others, the *S. eubayanus* chromosome is intact while the *S. cerevisiae* chromosome became chimeric, resulting in loss of heterozygosity.

# IMS0408

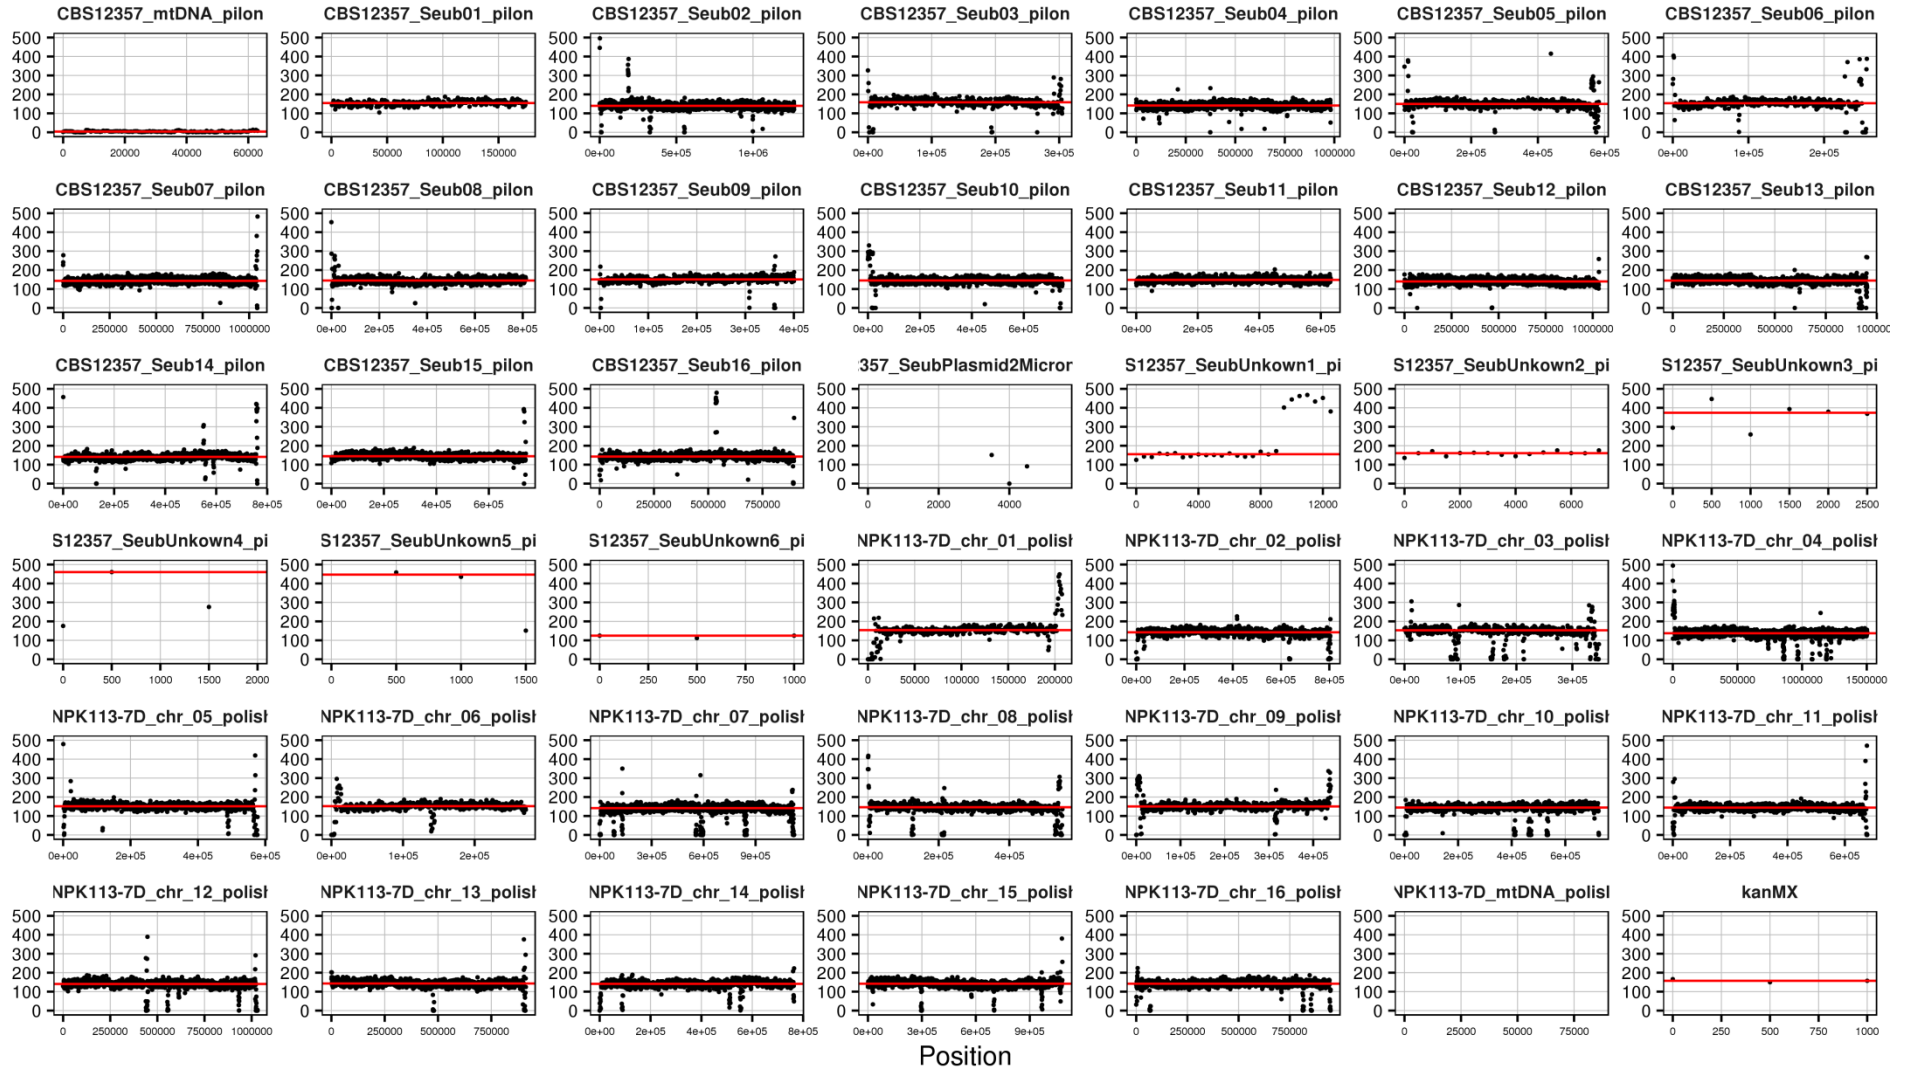

# IMX1421

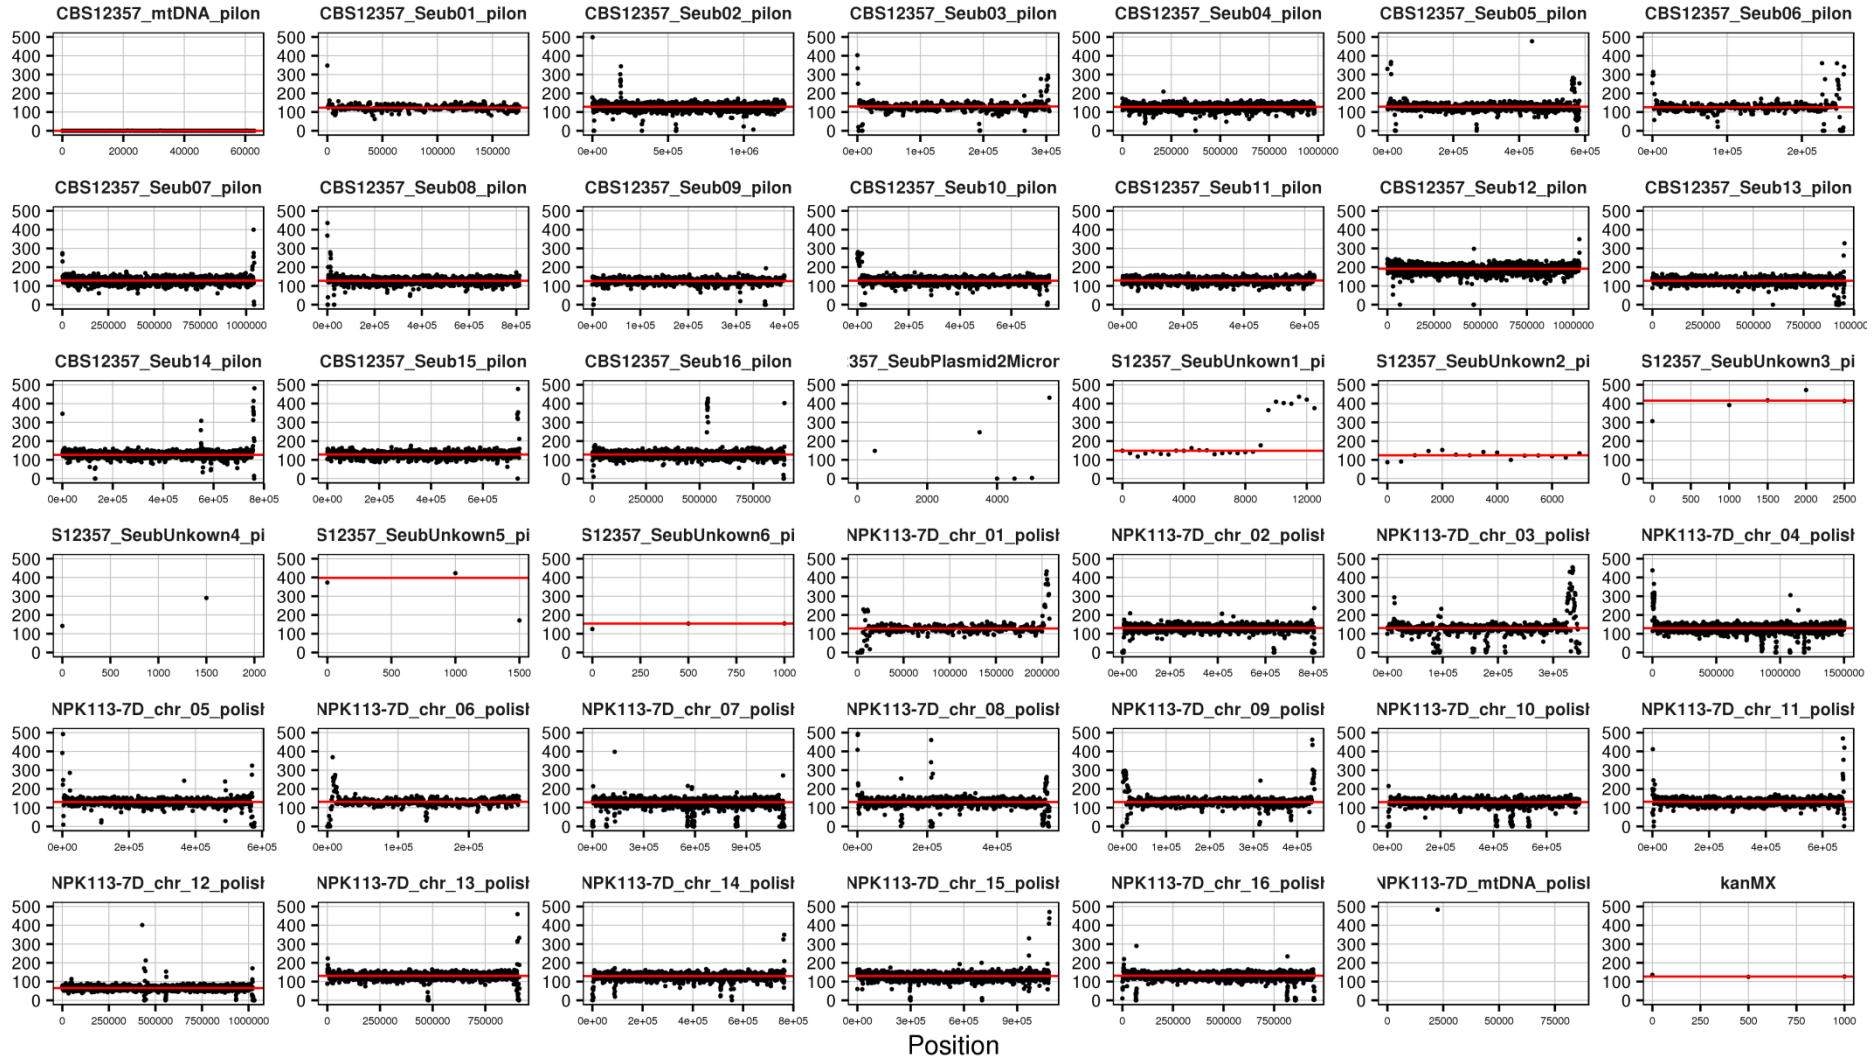

# IMX1422

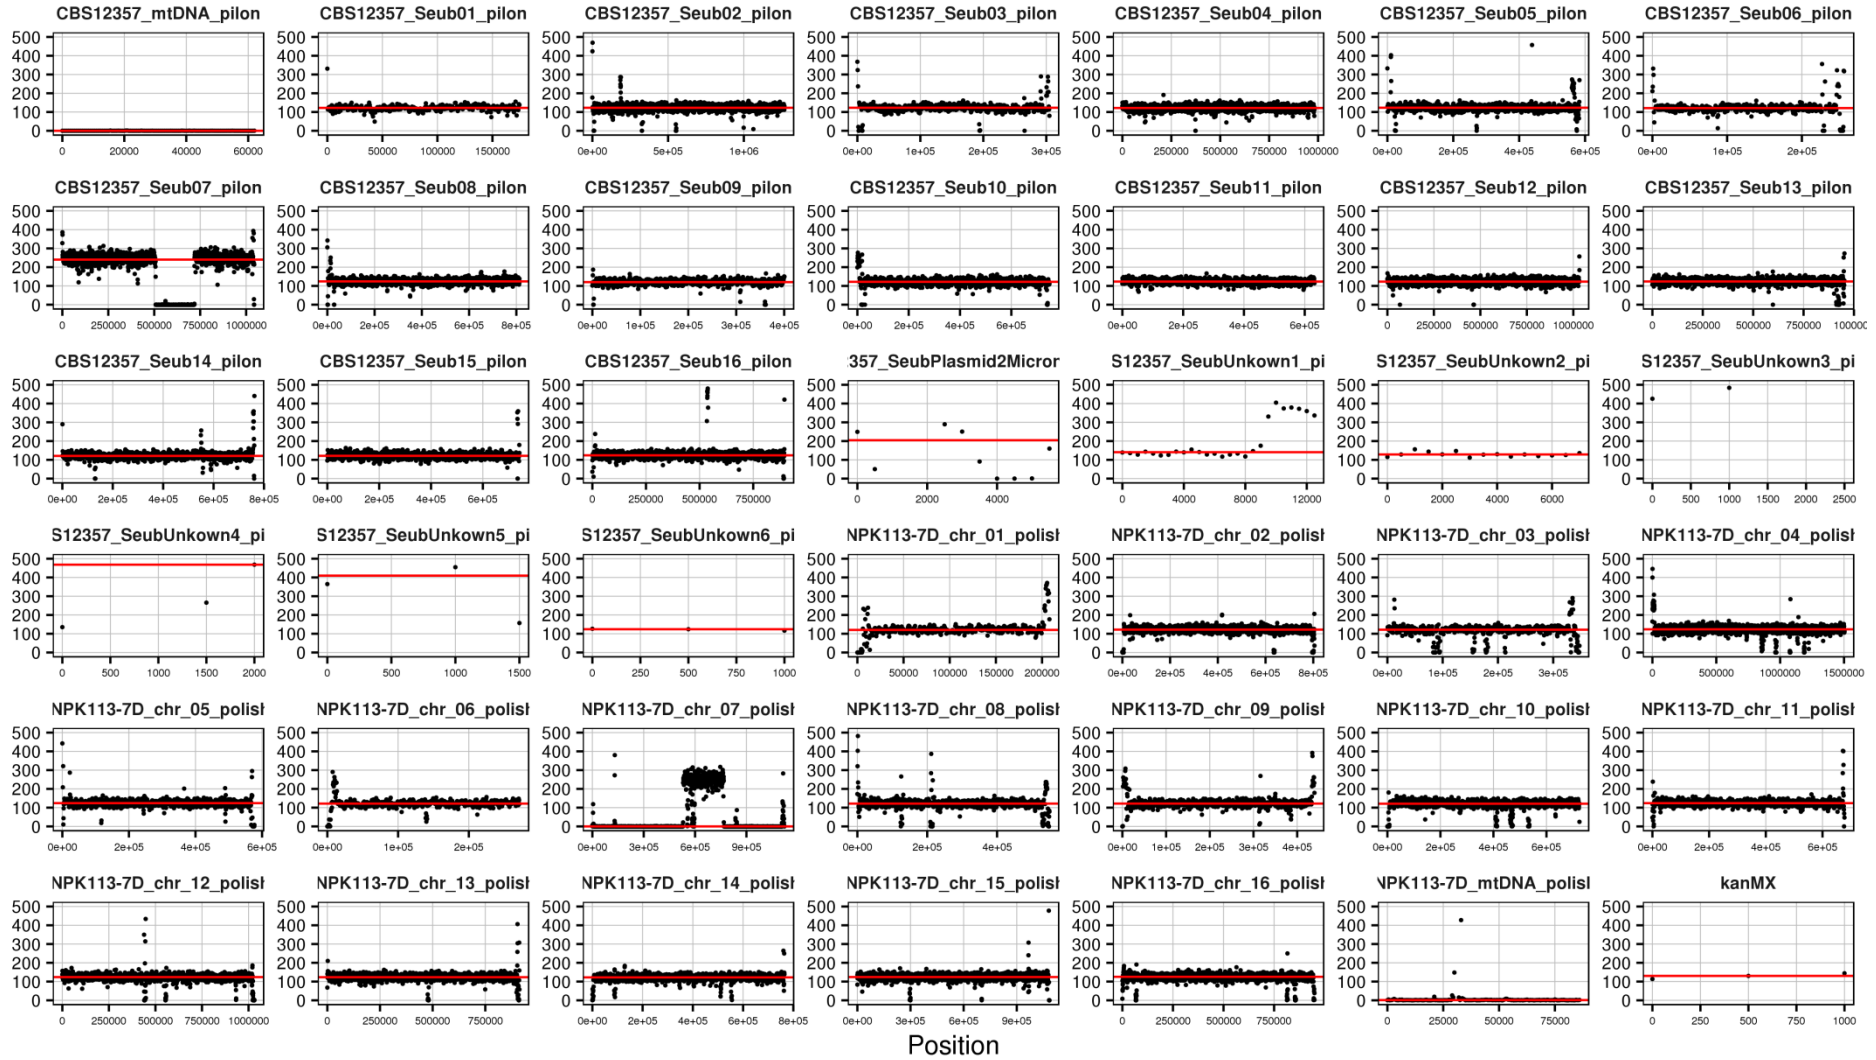

# IMX1423

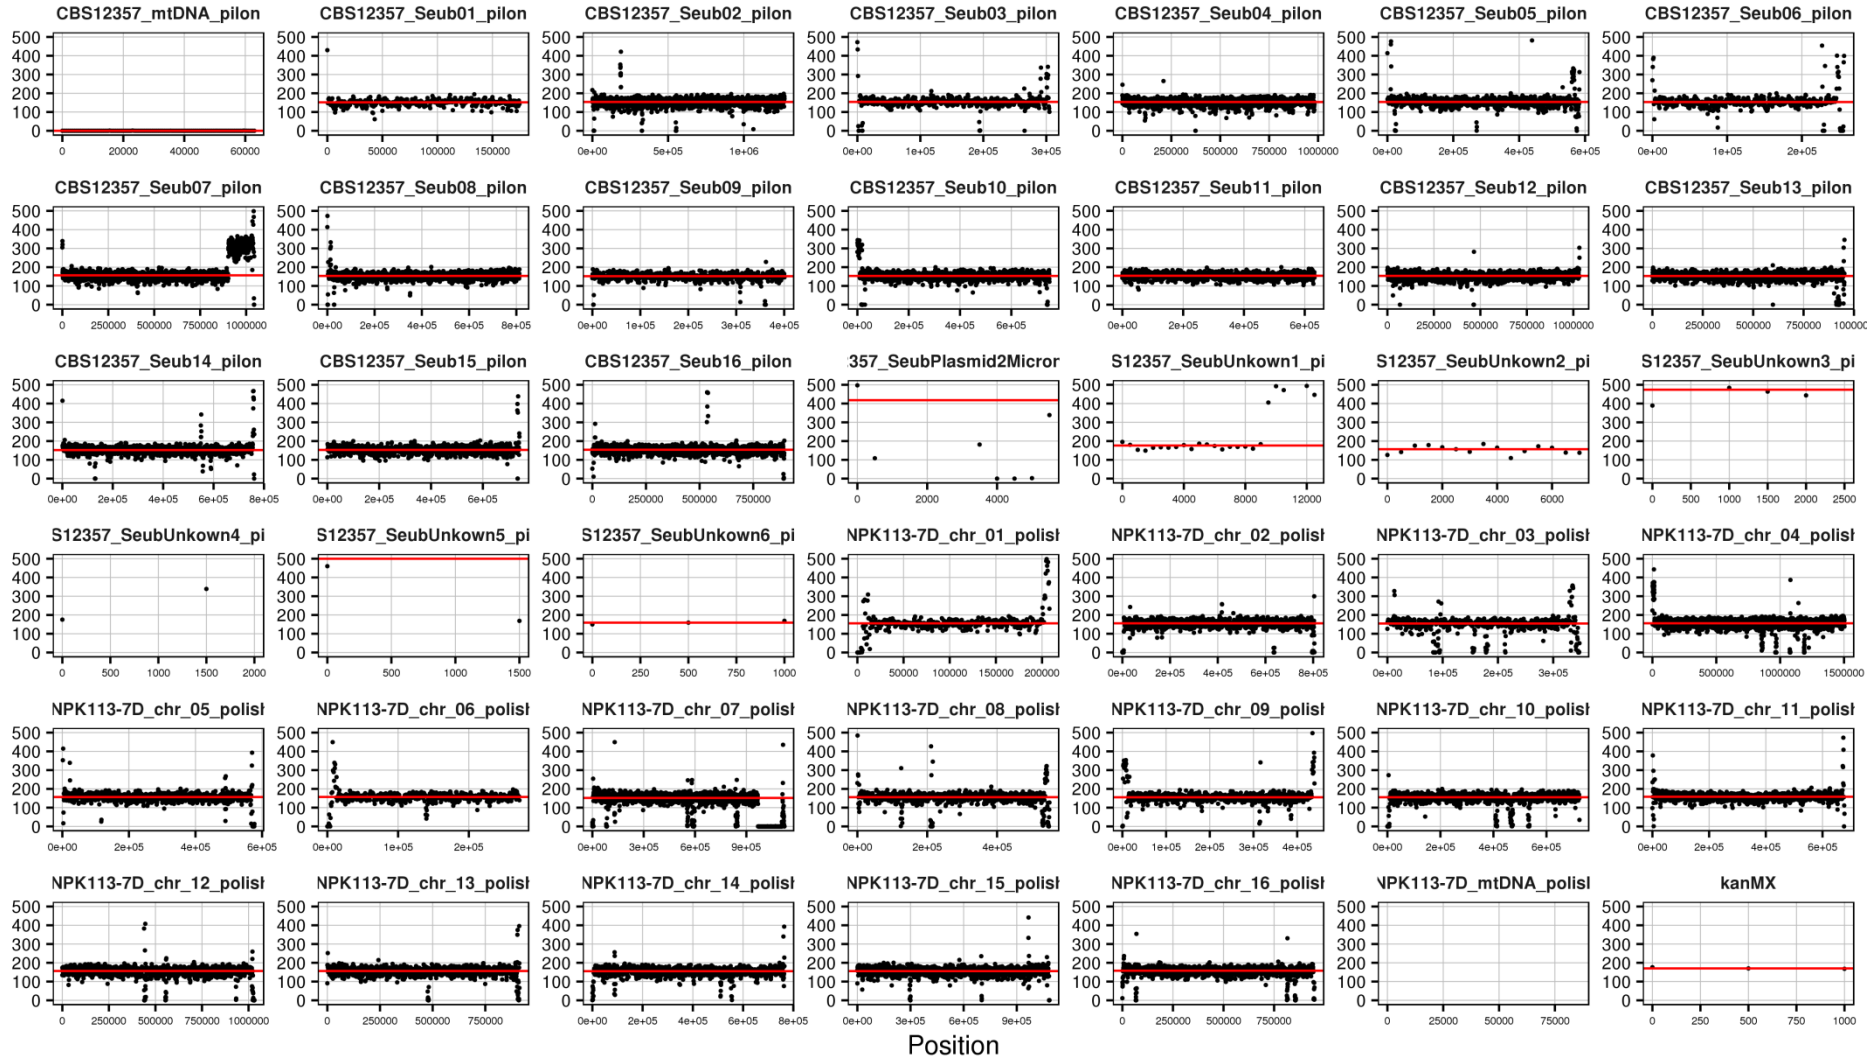



# IMX1423

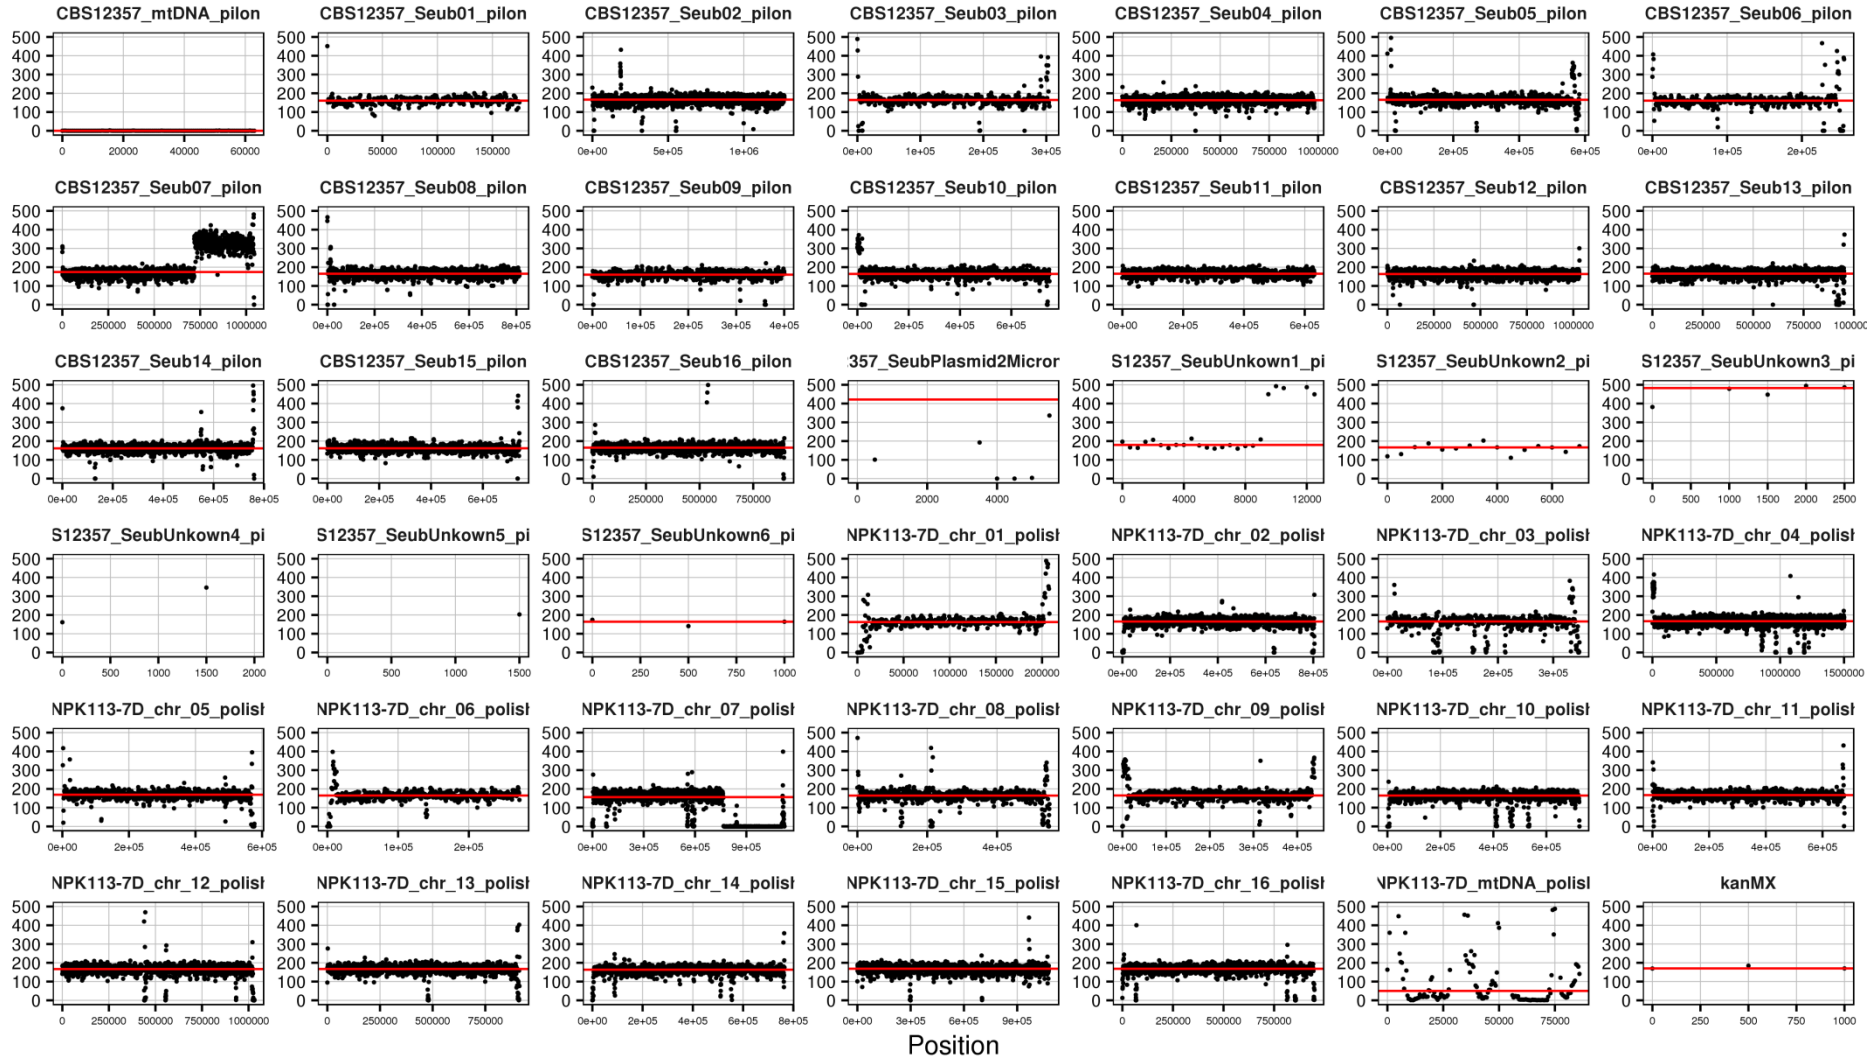

**Table S1. Fluorescence profiles of samples measured in this study.** For each targeted locus, three replicates from independent transformations were measured both with and without repair fragment. Single cells were selected on a FSC-A/FSC-H graph, Venus+ cells on a Venus/FSC-A graph and quartiles with and without fluorescence were gated on a mRuby2/mTurquoise2 graph, as indicated in Figure 1. The exact gating differed per strain, but was kept uniform among strains. All numbers are indicated in percentage of the parental gating, which is indicated in the top row, except for the single cells column, which indicates the number of single cells measured. The percentage of having lost mRuby2 or mTurquoise2 was calculated by adding the corresponding quartiles. When targeting cas9 in IMX1555, one of the replicates without repair fragment did not grow at all, therefore flow cytometric data could not be acquired.

| Strain  | Target | Repair | Single Cells | Venus <sup>+</sup> |                                             |                                             |                                             | Venus <sup>-</sup>                          |                                             |                                             |                                             |                                             |
|---------|--------|--------|--------------|--------------------|---------------------------------------------|---------------------------------------------|---------------------------------------------|---------------------------------------------|---------------------------------------------|---------------------------------------------|---------------------------------------------|---------------------------------------------|
|         |        |        |              | Venus <sup>+</sup> | mTurquoise <sup>+</sup> mRuby2 <sup>+</sup> | mTurquoise <sup>+</sup> mRuby2 <sup>-</sup> | mTurquoise <sup>-</sup> mRuby2 <sup>+</sup> | mTurquoise <sup>-</sup> mRuby2 <sup>-</sup> | mTurquoise <sup>+</sup> mRuby2 <sup>+</sup> | mTurquoise <sup>+</sup> mRuby2 <sup>-</sup> | mTurquoise <sup>-</sup> mRuby2 <sup>+</sup> | mTurquoise <sup>-</sup> mRuby2 <sup>-</sup> |
| IMX1555 | cas9   | +      | 84531        | 97,9               | 0,0                                         | 99,7                                        | 0,2                                         | 0,0                                         | 1,8                                         | 78,8                                        | 19,4                                        | 0,0                                         |
| IMX1555 | cas9   | +      | 83772        | 99,7               | 0,0                                         | 99,9                                        | 0,1                                         | 0,0                                         | 12,2                                        | 84,2                                        | 3,2                                         | 0,5                                         |
| IMX1555 | cas9   | +      | 84407        | 97,2               | 0,0                                         | 99,9                                        | 0,1                                         | 0,0                                         | 1,2                                         | 98,4                                        | 0,3                                         | 0,0                                         |
| IMX1555 | cas9   | -      | 84161        | 0,1                | 1,9                                         | 95,3                                        | 2,8                                         | 0,0                                         | 0,1                                         | 92,0                                        | 7,8                                         | 0,0                                         |
| IMX1555 | cas9   | -      | 82950        | 0,2                | 3,9                                         | 96,1                                        | 0,0                                         | 0,0                                         | 0,1                                         | 99,9                                        | 0,0                                         | 0,0                                         |
| IMX1555 | cas9   | -      | -            | -                  | -                                           | -                                           | -                                           | -                                           | -                                           | -                                           | -                                           | -                                           |
| IMX1557 | -      | -      | 85567        | 0,0                | 20,0                                        | 80,0                                        | 0,0                                         | 0,0                                         | 8,3                                         | 91,6                                        | 0,1                                         | 0,1                                         |
| IMX1557 | -      | -      | 85198        | 0,0                | 25,0                                        | 75,0                                        | 0,0                                         | 0,0                                         | 8,4                                         | 91,4                                        | 0,1                                         | 0,1                                         |
| IMX1557 | -      | -      | 84060        | 0,1                | 8,2                                         | 91,8                                        | 0,0                                         | 0,0                                         | 2,3                                         | 97,5                                        | 0,1                                         | 0,1                                         |
| IMX1557 | AIM9   | +      | 90511        | 97,6               | 0,0                                         | 97,9                                        | 2,1                                         | 0,0                                         | 40,4                                        | 49,6                                        | 9,5                                         | 0,5                                         |
| IMX1557 | AIM9   | +      | 84385        | 98,3               | 1,6                                         | 97,8                                        | 0,4                                         | 0,2                                         | 70,2                                        | 19,6                                        | 3,0                                         | 7,3                                         |
| IMX1557 | AIM9   | +      | 83120        | 99,8               | 18,8                                        | 81,2                                        | 0,0                                         | 0,0                                         | 67,2                                        | 32,4                                        | 0,5                                         | 0,0                                         |
| IMX1557 | AIM9   | -      | 90555        | 0,0                | 0,0                                         | 100,0                                       | 0,0                                         | 0,0                                         | 1,5                                         | 23,4                                        | 73,3                                        | 1,8                                         |
| IMX1557 | AIM9   | -      | 92034        | 0,0                | 0,0                                         | 100,0                                       | 0,0                                         | 0,0                                         | 2,2                                         | 17,3                                        | 80,1                                        | 0,4                                         |
| IMX1557 | AIM9   | -      | 87529        | 0,0                | 0,0                                         | 0,0                                         | 0,0                                         | 0,0                                         | 1,3                                         | 9,0                                         | 89,1                                        | 0,6                                         |
| IMX1557 | CAN1   | +      | 91519        | 0,8                | 0,1                                         | 98,7                                        | 1,1                                         | 0,0                                         | 1,2                                         | 95,5                                        | 3,2                                         | 0,1                                         |
| IMX1557 | CAN1   | +      | 91767        | 1,7                | 0,1                                         | 98,7                                        | 1,2                                         | 0,0                                         | 0,8                                         | 93,1                                        | 6,1                                         | 0,1                                         |
| IMX1557 | CAN1   | +      | 92089        | 0,4                | 0,0                                         | 99,4                                        | 0,6                                         | 0,0                                         | 0,5                                         | 95,3                                        | 4,0                                         | 0,2                                         |
| IMX1557 | CAN1   | -      | 91970        | 0,0                | 0,0                                         | 0,0                                         | 0,0                                         | 0,0                                         | 1,5                                         | 93,5                                        | 4,9                                         | 0,1                                         |
| IMX1557 | CAN1   | -      | 93115        | 0,0                | 0,0                                         | 0,0                                         | 0,0                                         | 0,0                                         | 0,9                                         | 92,4                                        | 6,6                                         | 0,1                                         |
| IMX1557 | CAN1   | -      | 91297        | 0,0                | 0,0                                         | 0,0                                         | 0,0                                         | 0,0                                         | 0,6                                         | 94,1                                        | 5,0                                         | 0,3                                         |
| IMX1557 | cas9   | +      | 85008        | 1,9                | 0,8                                         | 99,3                                        | 0,0                                         | 0,0                                         | 0,7                                         | 47,1                                        | 51,9                                        | 0,3                                         |
| IMX1557 | cas9   | +      | 83723        | 8,0                | 0,2                                         | 99,8                                        | 0,0                                         | 0,0                                         | 0,3                                         | 51,9                                        | 47,7                                        | 0,1                                         |
| IMX1557 | cas9   | +      | 82777        | 3,2                | 0,9                                         | 97,7                                        | 1,5                                         | 0,0                                         | 0,3                                         | 56,7                                        | 42,9                                        | 0,1                                         |
| IMX1557 | cas9   | -      | 81166        | 0,1                | 4,4                                         | 95,6                                        | 0,0                                         | 0,0                                         | 0,4                                         | 43,9                                        | 55,5                                        | 0,1                                         |
| IMX1557 | cas9   | -      | 83007        | 0,0                | 11,1                                        | 88,9                                        | 0,0                                         | 0,0                                         | 0,5                                         | 57,3                                        | 42,1                                        | 0,1                                         |
| IMX1557 | cas9   | -      | 81313        | 0,0                | 22,7                                        | 77,3                                        | 0,0                                         | 0,0                                         | 0,3                                         | 46,5                                        | 53,0                                        | 0,2                                         |
| IMX1557 | YCK3   | +      | 87009        | 98,9               | 26,9                                        | 73,0                                        | 0,1                                         | 0,0                                         | 83,0                                        | 14,3                                        | 0,5                                         | 2,2                                         |
| IMX1557 | YCK3   | +      | 80983        | 98,9               | 0,9                                         | 99,0                                        | 0,1                                         | 0,0                                         | 74,9                                        | 21,4                                        | 1,0                                         | 2,7                                         |
| IMX1557 | YCK3   | +      | 82570        | 99,7               | 0,1                                         | 99,8                                        | 0,1                                         | 0,0                                         | 51,6                                        | 47,6                                        | 0,4                                         | 0,4                                         |
| IMX1557 | YCK3   | -      | 79957        | 0,0                | 45,7                                        | 54,3                                        | 0,0                                         | 0,0                                         | 97,6                                        | 0,1                                         | 0,0                                         | 2,3                                         |
| IMX1557 | YCK3   | -      | 92277        | 0,0                | 0,0                                         | 100,0                                       | 0,0                                         | 0,0                                         | 89,0                                        | 9,0                                         | 0,6                                         | 1,6                                         |
| IMX1557 | YCK3   | -      | 92256        | 0,0                | 0,0                                         | 0,0                                         | 0,0                                         | 0,0                                         | 89,2                                        | 8,7                                         | 0,6                                         | 1,6                                         |
| IMX1585 | -      | -      | 84826        | 0,0                | 50,0                                        | 50,0                                        | 0,0                                         | 0,0                                         | 0,3                                         | 98,9                                        | 0,8                                         | 0,0                                         |
| IMX1585 | -      | -      | 84777        | 0,0                | 0,0                                         | 100,0                                       | 0,0                                         | 0,0                                         | 0,4                                         | 98,8                                        | 0,8                                         | 0,0                                         |
| IMX1585 | -      | -      | 80656        | 0,0                | 50,0                                        | 50,0                                        | 0,0                                         | 0,0                                         | 0,4                                         | 98,9                                        | 0,7                                         | 0,0                                         |
| IMX1585 | 550K   | -      | 78717        | 0,0                | 60,0                                        | 40,0                                        | 0,0                                         | 0,0                                         | 43,7                                        | 55,3                                        | 0,8                                         | 0,3                                         |
| IMX1585 | 550K   | -      | 80876        | 0,0                | 16,7                                        | 83,3                                        | 0,0                                         | 0,0                                         | 42,9                                        | 55,5                                        | 1,1                                         | 0,6                                         |
| IMX1585 | 550K   | -      | 76315        | 0,0                | 33,3                                        | 66,7                                        | 0,0                                         | 0,0                                         | 43,2                                        | 55,8                                        | 0,8                                         | 0,3                                         |
| IMX1585 | AIM9   | -      | 80253        | 0,0                | 14,3                                        | 85,7                                        | 0,0                                         | 0,0                                         | 13,6                                        | 84,9                                        | 1,4                                         | 0,1                                         |
| IMX1585 | AIM9   | -      | 81671        | 0,0                | 0,0                                         | 100,0                                       | 0,0                                         | 0,0                                         | 13,3                                        | 84,6                                        | 1,9                                         | 0,2                                         |
| IMX1585 | AIM9   | -      | 78711        | 0,0                | 0,0                                         | 100,0                                       | 0,0                                         | 0,0                                         | 13,5                                        | 84,8                                        | 1,6                                         | 0,1                                         |
| IMX1585 | cas9   | -      | 75002        | 0,0                | 7,7                                         | 92,3                                        | 0,0                                         | 0,0                                         | 0,4                                         | 55,6                                        | 43,8                                        | 0,2                                         |
| IMX1585 | cas9   | -      | 80788        | 0,0                | 25,0                                        | 75,0                                        | 0,0                                         | 0,0                                         | 0,2                                         | 52,0                                        | 47,8                                        | 0,1                                         |
| IMX1585 | cas9   | -      | 81085        | 0,0                | 0,0                                         | 100,0                                       | 0,0                                         | 0,0                                         | 0,2                                         | 51,4                                        | 48,3                                        | 0,0                                         |
| IMX1585 | FIR1   | -      | 82063        | 0,0                | 50,0                                        | 50,0                                        | 0,0                                         | 0,0                                         | 12,1                                        | 86,1                                        | 1,7                                         | 0,1                                         |
| IMX1585 | FIR1   | -      | 82033        | 0,0                | 0,0                                         | 100,0                                       | 0,0                                         | 0,0                                         | 11,6                                        | 86,0                                        | 2,3                                         | 0,2                                         |
| IMX1585 | FIR1   | -      | 76748        | 0,0                | 0,0                                         | 100,0                                       | 0,0                                         | 0,0                                         | 12,5                                        | 86,1                                        | 1,3                                         | 0,1                                         |
| IMX1585 | UTR2   | -      | 81225        | 0,0                | 0,0                                         | 100,0                                       | 0,0                                         | 0,0                                         | 0,2                                         | 88,5                                        | 11,3                                        | 0,0                                         |
| IMX1585 | UTR2   | -      | 79212        | 0,0                | 20,0                                        | 80,0                                        | 0,0                                         | 0,0                                         | 0,2                                         | 88,7                                        | 11,0                                        | 0,0                                         |
| IMX1585 | UTR2   | -      | 79061        | 0,0                | 0,0                                         | 0,0                                         | 0,0                                         | 0,0                                         | 0,3                                         | 88,6                                        | 11,1                                        | 0,0                                         |
| IMX1585 | YCK3   | -      | 80034        | 0,0                | 0,0                                         | 100,0                                       | 0,0                                         | 0,0                                         | 12,5                                        | 85,7                                        | 1,7                                         | 0,1                                         |
| IMX1585 | YCK3   | -      | 79346        | 0,0                | 0,0                                         | 100,0                                       | 0,0                                         | 0,0                                         | 12,4                                        | 86,0                                        | 1,5                                         | 0,1                                         |
| IMX1585 | YCK3   | -      | 79874        | 0,0                | 12,5                                        | 87,5                                        | 0,0                                         | 0,0                                         | 12,8                                        | 85,7                                        | 1,4                                         | 0,1                                         |



**Table S2: Loss of heterozygosity at the nucleotide level on chromosome V of the heterozygous diploid IMX1585 and in IMX1585-derived isolates in which the CEN.PK113-7D derived alleles of the *UTR2* or *FIR1* loci were targeted using Cas9.** Upon targeting of *UTR2* and *FIR1*, 10 isolates having conserved fluorescence of mRuby2 and mTurquoise2 were and 10 isolates having lost the fluorophore located on the targeted fluorophore were isolated for each targeted locus using FACS. Purified DNA of each isolate was sequenced using 150 bp pair-end Illumina reads. After alignment of the reads to the genome assembly of CEN.PK113-7D, heterozygous and homozygous SNPs and INDELS were called and used to identify nucleotides which had become homozygous for the S288C allele in the isolates which were heterozygous in IMX1585. Since there were ca. 4 heterozygous nucleotides per kbp in IMX1585, the resolution at which loss of heterozygosity could be detected was dependent upon the presence of heterozygous nucleotides at that location in IMX1585. Nucleotides which became homozygous for the CEN.PK113-7D allele were never observed. The number of hemizygous SNPs and INDELS called in S288C (Supplementary information X) which were lost due to the loss of heterozygosity is shown as “Mutations”.

| Strain  | Targeted Locus | Fluorescence                                | Homozygous nucleotides                | Heterozygous nucleotides                  | Mutations |
|---------|----------------|---------------------------------------------|---------------------------------------|-------------------------------------------|-----------|
| IMX1585 | -              | Ruby <sup>+</sup> /mTurquoise2 <sup>+</sup> | 1-577607                              |                                           | 0         |
| IMX1596 | <i>UTR2</i>    | Ruby <sup>+</sup> /mTurquoise2 <sup>+</sup> | 1-84628                               | 86629-577607                              | 443       |
| IMX1597 | <i>UTR2</i>    | Ruby <sup>+</sup> /mTurquoise2 <sup>+</sup> | 1-110289                              | 143879-577607                             | 502       |
| IMX1598 | <i>UTR2</i>    | Ruby <sup>+</sup> /mTurquoise2 <sup>+</sup> | 1-79859                               | 80023-577607                              | 387       |
| IMX1599 | <i>UTR2</i>    | Ruby <sup>+</sup> /mTurquoise2 <sup>+</sup> | 1-80609                               | 81042-577607                              | 401       |
| IMX1600 | <i>UTR2</i>    | Ruby <sup>+</sup> /mTurquoise2 <sup>+</sup> | 1-92729                               | 97030-577607                              | 459       |
| IMX1601 | <i>UTR2</i>    | Ruby <sup>+</sup> /mTurquoise2 <sup>+</sup> | 1-79859                               | 80023-577607                              | 387       |
| IMX1602 | <i>UTR2</i>    | Ruby <sup>+</sup> /mTurquoise2 <sup>+</sup> | 1-92729                               | 97030-577607                              | 459       |
| IMX1603 | <i>UTR2</i>    | Ruby <sup>+</sup> /mTurquoise2 <sup>+</sup> | 1-92729                               | 97030-577607                              | 459       |
| IMX1604 | <i>UTR2</i>    | Ruby <sup>+</sup> /mTurquoise2 <sup>+</sup> | 1-92729                               | 97030-577607                              | 459       |
| IMX1605 | <i>UTR2</i>    | Ruby <sup>+</sup> /mTurquoise2 <sup>+</sup> | 1-77600, 78882-79859                  | 78423-78522, 80023-577607                 | 385       |
| IMX1606 | <i>UTR2</i>    | Ruby <sup>+</sup> /mTurquoise2 <sup>+</sup> | 78423-80377, 80609                    | 1-77600, 80469-80587, 81042-577607        | 15        |
| IMX1607 | <i>UTR2</i>    | Ruby <sup>+</sup> /mTurquoise2 <sup>+</sup> | 68797-82144                           | 1-47413, 82157-577607                     | 121       |
| IMX1608 | <i>UTR2</i>    | Ruby <sup>+</sup> /mTurquoise2 <sup>+</sup> | 75235-80609, 82012-82652, 83580-92729 | 1-74650, 81042-81700, 83201, 97030-577607 | 80        |
| IMX1609 | <i>UTR2</i>    | Ruby <sup>+</sup> /mTurquoise2 <sup>+</sup> | 79857-79859                           | 1-79751, 80023-577607                     | 2         |
| IMX1610 | <i>UTR2</i>    | Ruby <sup>+</sup> /mTurquoise2 <sup>+</sup> | 73657-79859                           | 1-73052, 80023-577607                     | 2         |
| IMX1611 | <i>UTR2</i>    | Ruby <sup>+</sup> /mTurquoise2 <sup>+</sup> | 78423-82091                           | 1-77600, 82144-577607                     | 41        |
| IMX1612 | <i>UTR2</i>    | Ruby <sup>+</sup> /mTurquoise2 <sup>+</sup> | 79857-79859                           | 1-79751, 80023-577607                     | 2         |
| IMX1613 | <i>UTR2</i>    | Ruby <sup>+</sup> /mTurquoise2 <sup>+</sup> | 78423-80377, 80609                    | 1-77600, 80469-80588, 81042-577607        | 15        |
| IMX1614 | <i>UTR2</i>    | Ruby <sup>+</sup> /mTurquoise2 <sup>+</sup> | 74385-79859                           | 1-74094, 80023-577607                     | 33        |
| IMX1615 | <i>UTR2</i>    | Ruby <sup>+</sup> /mTurquoise2 <sup>+</sup> | 79857-83201                           | 1-79751, 83580-577607                     | 43        |
| IMX1616 | <i>FIR1</i>    | Ruby <sup>+</sup> /mTurquoise2 <sup>-</sup> | 216993-577607                         | 1-216630                                  | 1687      |
| IMX1617 | <i>FIR1</i>    | Ruby <sup>+</sup> /mTurquoise2 <sup>-</sup> | 214818-577607                         | 1-204146                                  | 1697      |
| IMX1618 | <i>FIR1</i>    | Ruby <sup>+</sup> /mTurquoise2 <sup>-</sup> | 217767-577607                         | 1-217602                                  | 1681      |
| IMX1619 | <i>FIR1</i>    | Ruby <sup>+</sup> /mTurquoise2 <sup>-</sup> | 216993-218163, 220098-577607          | 1-216360, 218645-219357                   | 1681      |
| IMX1620 | <i>FIR1</i>    | Ruby <sup>+</sup> /mTurquoise2 <sup>-</sup> | 217767-577607                         | 1-217602                                  | 1681      |
| IMX1621 | <i>FIR1</i>    | Ruby <sup>+</sup> /mTurquoise2 <sup>-</sup> | 216993-577607                         | 1-216360                                  | 1687      |
| IMX1622 | <i>FIR1</i>    | Ruby <sup>+</sup> /mTurquoise2 <sup>-</sup> | 216993-577607                         | 1-216360                                  | 1687      |
| IMX1623 | <i>FIR1</i>    | Ruby <sup>+</sup> /mTurquoise2 <sup>-</sup> | 214818-577607                         | 1-204146                                  | 1697      |
| IMX1624 | <i>FIR1</i>    | Ruby <sup>+</sup> /mTurquoise2 <sup>-</sup> | 214818-577607                         | 1-204146                                  | 1697      |
| IMX1625 | <i>FIR1</i>    | Ruby <sup>+</sup> /mTurquoise2 <sup>-</sup> | 216993-577607                         | 1-216360                                  | 1687      |
| IMX1626 | <i>FIR1</i>    | Ruby <sup>+</sup> /mTurquoise2 <sup>+</sup> | 217767-217767                         | 1-217602, 217908-577607                   | 1         |
| IMX1627 | <i>FIR1</i>    | Ruby <sup>+</sup> /mTurquoise2 <sup>+</sup> | 217767-217767                         | 1-217602, 217908-577607                   | 1         |

|         |             |                                             |               |                         |    |
|---------|-------------|---------------------------------------------|---------------|-------------------------|----|
| IMX1628 | <i>FIR1</i> | Ruby <sup>+</sup> /mTurquoise2 <sup>+</sup> | 217458-219121 | 1-217338, 219357-577607 | 10 |
| IMX1629 | <i>FIR1</i> | Ruby <sup>+</sup> /mTurquoise2 <sup>+</sup> | 217602-217767 | 1-217458, 217908-577607 | 2  |
| IMX1630 | <i>FIR1</i> | Ruby <sup>+</sup> /mTurquoise2 <sup>+</sup> | 217767-217767 | 1-217602, 217908-577607 | 1  |
| IMX1631 | <i>FIR1</i> | Ruby <sup>+</sup> /mTurquoise2 <sup>+</sup> | 216993-217767 | 1-216360, 217908-577607 | 7  |
| IMX1632 | <i>FIR1</i> | Ruby <sup>+</sup> /mTurquoise2 <sup>+</sup> | 214818-226717 | 1-204146, 227223-577607 | 80 |
| IMX1633 | <i>FIR1</i> | Ruby <sup>+</sup> /mTurquoise2 <sup>+</sup> | 217458-219357 | 1-217338, 220098-577607 | 11 |
| IMX1634 | <i>FIR1</i> | Ruby <sup>+</sup> /mTurquoise2 <sup>+</sup> | 217458-217908 | 1-217338, 218163-577607 | 4  |
| IMX1635 | <i>FIR1</i> | Ruby <sup>+</sup> /mTurquoise2 <sup>+</sup> | 217767-219121 | 1-217602, 219357-577607 | 8  |

**Table S3: *Saccharomyces* strains used throughout this study.**

| Name         | Species              | Ploidy | Strain background | Relevant Genotype                                                                                                                                                                  | Source       |
|--------------|----------------------|--------|-------------------|------------------------------------------------------------------------------------------------------------------------------------------------------------------------------------|--------------|
| CEN.PK113-7D | <i>S. cerevisiae</i> | 1N     | CEN.PK            | <i>MAT<math>\alpha</math> SIT1 CAN1 UTR2 URA3 FIR1 AIM9 YCK3 FAU1</i>                                                                                                              | <sup>1</sup> |
| IMX581       | <i>S. cerevisiae</i> | 1N     | CEN.PK            | <i>MAT<math>\alpha</math> SIT1 can1::cas9-natNT2 UTR2 ura3-52 FIR1 AIM9 YCK3 FAU1</i>                                                                                              | <sup>2</sup> |
| IMX1544      | <i>S. cerevisiae</i> | 1N     | CEN.PK            | <i>MAT<math>\alpha</math> sit1::mRuby2 can1::cas9-natNT2 UTR2 ura3-52 FIR1 AIM9 YCK3 FAU1</i>                                                                                      | This study   |
| IMX1555      | <i>S. cerevisiae</i> | 1N     | CEN.PK            | <i>MAT<math>\alpha</math> sit1::mRuby2 can1::cas9-natNT2 UTR2 ura3-52 FIR1 AIM9 YCK3 fau1::mTurquoise2</i>                                                                         | This study   |
| IMK439       | <i>S. cerevisiae</i> | 1N     | CEN.PK            | <i>MAT<math>\alpha</math> SIT1 CAN1 UTR2 ura3::KanMX FIR1 AIM9 YCK3 FAU1</i>                                                                                                       | <sup>3</sup> |
| IMX1557      | <i>S. cerevisiae</i> | 2N     | CEN.PK CEN.PK     | <i>MAT<math>\alpha</math> /MAT<math>\alpha</math> sit1::mRuby2/SIT1 can1::cas9-natNT2/CAN1 UTR2/UTR2 ura3-52 ura3::KanMX FIR1/FIR1 AIM9/AIM9 YCK3/YCK3 fau1::mTurquoise2/FAU1</i>  | This study   |
| S288C        | <i>S. cerevisiae</i> | 1N     | S288C             | <i>MAT<math>\alpha</math> SIT1 CAN1 UTR2 URA3 FIR1 AIM9 YCK3 FAU1</i>                                                                                                              | <sup>4</sup> |
| IMX1585      | <i>S. cerevisiae</i> | 2N     | CEN.PK/S288C      | <i>MAT<math>\alpha</math> /MAT<math>\alpha</math> sit1::mRuby2/SIT1 can1::cas9-natNT2/CAN1 UTR2/UTR2 ura3-52/ura3::KanMX FIR1/FIR1 AIM9/AIM9 YCK3/YCK3 fau1::mTurquoise2/FAU1</i>  | This study   |
| IMX1596      | <i>S. cerevisiae</i> | 2N     | CEN.PK/S288C      | <i>MAT<math>\alpha</math> /MAT<math>\alpha</math> SIT1/SIT1 can1::cas9-natNT2/CAN1 UTR2/UTR2 ura3-52/ ura3::KanMX FIR1/FIR1 AIM9/AIM9 YCK3/YCK3 fau1::mTurquoise2/FAU1</i>         | This study   |
| IMX1597      | <i>S. cerevisiae</i> | 2N     | CEN.PK/S288C      | <i>MAT<math>\alpha</math> /MAT<math>\alpha</math> SIT1/SIT1 can1::cas9-natNT2/CAN1 UTR2/UTR2 ura3-52/ ura3::KanMX FIR1/FIR1 AIM9/AIM9 YCK3/YCK3 fau1::mTurquoise2/FAU1</i>         | This study   |
| IMX1598      | <i>S. cerevisiae</i> | 2N     | CEN.PK/S288C      | <i>MAT<math>\alpha</math> /MAT<math>\alpha</math> SIT1/SIT1 can1::cas9-natNT2/CAN1 UTR2/UTR2 ura3-52/ ura3::KanMX FIR1/FIR1 AIM9/AIM9 YCK3/YCK3 fau1::mTurquoise2/FAU1</i>         | This study   |
| IMX1599      | <i>S. cerevisiae</i> | 2N     | CEN.PK/S288C      | <i>MAT<math>\alpha</math> /MAT<math>\alpha</math> SIT1/SIT1 can1::cas9-natNT2/CAN1 UTR2/UTR2 ura3-52/ ura3::KanMX FIR1/FIR1 AIM9/AIM9 YCK3/YCK3 fau1::mTurquoise2/FAU1</i>         | This study   |
| IMX1600      | <i>S. cerevisiae</i> | 2N     | CEN.PK/S288C      | <i>MAT<math>\alpha</math> /MAT<math>\alpha</math> SIT1/SIT1 can1::cas9-natNT2/CAN1 UTR2/UTR2 ura3-52/ ura3::KanMX FIR1/FIR1 AIM9/AIM9 YCK3/YCK3 fau1::mTurquoise2/FAU1</i>         | This study   |
| IMX1601      | <i>S. cerevisiae</i> | 2N     | CEN.PK/S288C      | <i>MAT<math>\alpha</math> /MAT<math>\alpha</math> SIT1/SIT1 can1::cas9-natNT2/CAN1 UTR2/UTR2 ura3-52/ ura3::KanMX FIR1/FIR1 AIM9/AIM9 YCK3/YCK3 fau1::mTurquoise2/FAU1</i>         | This study   |
| IMX1602      | <i>S. cerevisiae</i> | 2N     | CEN.PK/S288C      | <i>MAT<math>\alpha</math> /MAT<math>\alpha</math> SIT1/SIT1 can1::cas9-natNT2/CAN1 UTR2/UTR2 ura3-52/ ura3::KanMX FIR1/FIR1 AIM9/AIM9 YCK3/YCK3 fau1::mTurquoise2/FAU1</i>         | This study   |
| IMX1603      | <i>S. cerevisiae</i> | 2N     | CEN.PK/S288C      | <i>MAT<math>\alpha</math> /MAT<math>\alpha</math> SIT1/SIT1 can1::cas9-natNT2/CAN1 UTR2/UTR2 ura3-52/ ura3::KanMX FIR1/FIR1 AIM9/AIM9 YCK3/YCK3 fau1::mTurquoise2/FAU1</i>         | This study   |
| IMX1604      | <i>S. cerevisiae</i> | 2N     | CEN.PK/S288C      | <i>MAT<math>\alpha</math> /MAT<math>\alpha</math> SIT1/SIT1 can1::cas9-natNT2/CAN1 UTR2/UTR2 ura3-52/ ura3::KanMX FIR1/FIR1 AIM9/AIM9 YCK3/YCK3 fau1::mTurquoise2/FAU1</i>         | This study   |
| IMX1605      | <i>S. cerevisiae</i> | 2N     | CEN.PK/S288C      | <i>MAT<math>\alpha</math> /MAT<math>\alpha</math> SIT1/SIT1 can1::cas9-natNT2/CAN1 UTR2/UTR2 ura3-52/ ura3::KanMX FIR1/FIR1 AIM9/AIM9 YCK3/YCK3 fau1::mTurquoise2/FAU1</i>         | This study   |
| IMX1606      | <i>S. cerevisiae</i> | 2N     | CEN.PK/S288C      | <i>MAT<math>\alpha</math> /MAT<math>\alpha</math> sit1::mRuby2/SIT1 can1::cas9-natNT2/CAN1 UTR2/UTR2 ura3-52/ ura3::KanMX FIR1/FIR1 AIM9/AIM9 YCK3/YCK3 fau1::mTurquoise2/FAU1</i> | This study   |
| IMX1607      | <i>S. cerevisiae</i> | 2N     | CEN.PK/S288C      | <i>MAT<math>\alpha</math> /MAT<math>\alpha</math> sit1::mRuby2/SIT1 can1::cas9-natNT2/CAN1 UTR2/UTR2 ura3-52/ ura3::KanMX FIR1/FIR1 AIM9/AIM9 YCK3/YCK3 fau1::mTurquoise2/FAU1</i> | This study   |
| IMX1608      | <i>S. cerevisiae</i> | 2N     | CEN.PK/S288C      | <i>MAT<math>\alpha</math> /MAT<math>\alpha</math> sit1::mRuby2/SIT1 can1::cas9-natNT2/CAN1 UTR2/UTR2 ura3-52/ ura3::KanMX FIR1/FIR1 AIM9/AIM9 YCK3/YCK3 fau1::mTurquoise2/FAU1</i> | This study   |
| IMX1609      | <i>S. cerevisiae</i> | 2N     | CEN.PK/S288C      | <i>MAT<math>\alpha</math> /MAT<math>\alpha</math> sit1::mRuby2/SIT1 can1::cas9-natNT2/CAN1 UTR2/UTR2 ura3-52/ ura3::KanMX FIR1/FIR1 AIM9/AIM9 YCK3/YCK3 fau1::mTurquoise2/FAU1</i> | This study   |
| IMX1610      | <i>S. cerevisiae</i> | 2N     | CEN.PK/S288C      | <i>MAT<math>\alpha</math> /MAT<math>\alpha</math> sit1::mRuby2/SIT1 can1::cas9-natNT2/CAN1 UTR2/UTR2 ura3-52/ ura3::KanMX FIR1/FIR1 AIM9/AIM9 YCK3/YCK3</i>                        | This study   |



|          |                                  |    |                 |                                                                                                                                                |              |
|----------|----------------------------------|----|-----------------|------------------------------------------------------------------------------------------------------------------------------------------------|--------------|
| IMX1631  | <i>S. cerevisiae</i>             | 2N | CEN.PK/S288C    | <i>MATa /MATα sit1::mRuby2/SIT1 can1::cas9-natNT2/CAN1 UTR2/UTR2 ura3-52/ ura3::KanMX FIR1/FIR1 AIM9/AIM9 YCK3/YCK3 fau1::mTurquoise2/FAU1</i> | This study   |
| IMX1632  | <i>S. cerevisiae</i>             | 2N | CEN.PK/S288C    | <i>MATa /MATα sit1::mRuby2/SIT1 can1::cas9-natNT2/CAN1 UTR2/UTR2 ura3-52/ ura3::KanMX FIR1/FIR1 AIM9/AIM9 YCK3/YCK3 fau1::mTurquoise2/FAU1</i> | This study   |
| IMX1633  | <i>S. cerevisiae</i>             | 2N | CEN.PK/S288C    | <i>MATa /MATα sit1::mRuby2/SIT1 can1::cas9-natNT2/CAN1 UTR2/UTR2 ura3-52/ ura3::KanMX FIR1/FIR1 AIM9/AIM9 YCK3/YCK3 fau1::mTurquoise2/FAU1</i> | This study   |
| IMX1634  | <i>S. cerevisiae</i>             | 2N | CEN.PK/S288C    | <i>MATa /MATα sit1::mRuby2/SIT1 can1::cas9-natNT2/CAN1 UTR2/UTR2 ura3-52/ ura3::KanMX FIR1/FIR1 AIM9/AIM9 YCK3/YCK3 fau1::mTurquoise2/FAU1</i> | This study   |
| IMX1635  | <i>S. cerevisiae</i>             | 2N | CEN.PK/S288C    | <i>MATa /MATα sit1::mRuby2/SIT1 can1::cas9-natNT2/CAN1 UTR2/UTR2 ura3-52/ ura3::KanMX FIR1/FIR1 AIM9/AIM9 YCK3/YCK3 fau1::mTurquoise2/FAU1</i> | This study   |
| CBS12357 | <i>S. eubayanus</i>              | 2N | CBS12357        | <i>MATa /MATα wildtype</i>                                                                                                                     | <sup>5</sup> |
| IMS0408  | <i>S. cerevisiae x eubayanus</i> | 2N | CEN.PK/CBS12357 | <i>MATa /MATα ura3::KanMX/URA3 MAL11</i>                                                                                                       | <sup>6</sup> |
| IMX1421  | <i>S. cerevisiae x eubayanus</i> | 2N | CEN.PK/CBS12357 | <i>MATa /MATα ura3::KanMX/URA3</i>                                                                                                             | This study   |
| IMX1422  | <i>S. cerevisiae x eubayanus</i> | 2N | CEN.PK/CBS12357 | <i>MATa /MATα ura3::KanMX/URA3</i>                                                                                                             | This study   |
| IMX1423  | <i>S. cerevisiae x eubayanus</i> | 2N | CEN.PK/CBS12357 | <i>MATa /MATα ura3::KanMX/URA3</i>                                                                                                             | This study   |
| IMX1424  | <i>S. cerevisiae x eubayanus</i> | 2N | CEN.PK/CBS12357 | <i>MATa /MATα ura3::KanMX/URA3</i>                                                                                                             | This study   |

- 1 Salazar, A. N. *et al.* Nanopore sequencing enables near-complete de novo assembly of *Saccharomyces cerevisiae* reference strain CEN. PK113-7D. *FEMS yeast research* **17** (2017).
- 2 Mans, R. *et al.* CRISPR/Cas9: a molecular Swiss army knife for simultaneous introduction of multiple genetic modifications in *Saccharomyces cerevisiae*. *FEMS yeast research* **15** (2015).
- 3 González-Ramos, D., van den Broek, M., van Maris, A. J., Pronk, J. T. & Daran, J.-M. G. Genome-scale analyses of butanol tolerance in *Saccharomyces cerevisiae* reveal an essential role of protein degradation. *Biotechnology for biofuels* **6**, 48 (2013).
- 4 Mortimer, R. K. & Johnston, J. R. Genealogy of principal strains of the yeast genetic stock center. *Genetics* **113**, 35-43 (1986).
- 5 Libkind, D. *et al.* Microbe domestication and the identification of the wild genetic stock of lager-brewing yeast. *Proceedings of the National Academy of Sciences* **108**, 14539-14544 (2011).
- 6 Hebly, M. *et al.* *S. cerevisiae* × *S. eubayanus* interspecific hybrid, the best of both worlds and beyond. *FEMS yeast research* **15** (2015).

**Table S4: Plasmids used throughout this study.** Plasmid parts used for the assembly of pUD429-pUD431 and pUDE480-pUDE482 were standard pYTK plasmids<sup>1</sup>.

| Name    | Relevant genotype                                                           | Origin       |
|---------|-----------------------------------------------------------------------------|--------------|
| pUD429  | ori amp <sup>R</sup> ARS4/CEN6 hyg <sup>R</sup> GFP                         | This study   |
| pUD430  | ori amp <sup>R</sup> ARS4/CEN6 hyg <sup>R</sup> GFP                         | This study   |
| pUD431  | ori amp <sup>R</sup> ARS4/CEN6 hyg <sup>R</sup> GFP                         | This study   |
| pUD574  | ori amp <sup>R</sup> gRNA-MAL11                                             | GeneArt™     |
| pUDE480 | ori amp <sup>R</sup> ARS4/CEN6 hyg <sup>R</sup> ScPGK1p-mRuby2-ScPGK1t      | This study   |
| pUDE481 | ori amp <sup>R</sup> ARS4/CEN6 hyg <sup>R</sup> ScTDH3p-mTurquoise2-ScADH1t | This study   |
| pUDE482 | ori amp <sup>R</sup> ARS4/CEN6 hyg <sup>R</sup> ScTEF1p-Venus-ScENO2t       | This study   |
| pMEL11  | ori amp <sup>R</sup> 2μm amdSYM gRNA-CAN1.Y                                 | <sup>2</sup> |
| pROS11  | ori amp <sup>R</sup> 2μm amdSYM gRNA-CAN1.Y gRNA-ADE2.Y                     | <sup>2</sup> |
| pUDR323 | ori amp <sup>R</sup> 2μm amdSYM gRNA-SIT1                                   | This study   |
| pUDR324 | ori amp <sup>R</sup> 2μm amdSYM gRNA-FAU1                                   | This study   |
| pUDR325 | ori amp <sup>R</sup> 2μm amdSYM gRNA-Cas9                                   | This study   |
| pUDR358 | ori amp <sup>R</sup> 2μm amdSYM gRNA-UTR2                                   | This study   |
| pUDR359 | ori amp <sup>R</sup> 2μm amdSYM gRNA-FIR1                                   | This study   |
| pUDR360 | ori amp <sup>R</sup> 2μm amdSYM gRNA-AIM9                                   | This study   |
| pUDR361 | ori amp <sup>R</sup> 2μm amdSYM gRNA-YCK3                                   | This study   |
| pUDR362 | ori amp <sup>R</sup> 2μm amdSYM gRNA-550K                                   | This study   |
| pUDP004 | ori amp <sup>R</sup> panARSopt amdSYM cas9                                  | <sup>3</sup> |
| pUDP045 | ori amp <sup>R</sup> panARSopt amdSYM cas9 gRNA-MAL11                       | This study   |

- 1 Lee, M. E., DeLoache, W. C., Cervantes, B. & Dueber, J. E. A highly characterized yeast toolkit for modular, multipart assembly. *ACS synthetic biology* **4**, 975-986 (2015).
- 2 Mans, R. *et al.* CRISPR/Cas9: a molecular Swiss army knife for simultaneous introduction of multiple genetic modifications in *Saccharomyces cerevisiae*. *FEMS yeast research* **15** (2015).
- 3 Gorter de Vries, A. R., de Groot, P. A., van den Broek, M. & Daran, J.-M. G. CRISPR-Cas9 mediated gene deletions in lager yeast *Saccharomyces pastorianus*. *Microb. Cell. Fact.* **16**, 222 (2017).



Table S5: Primers used in this study.

| name  | Sequence (3' to 5')                                                                                             | Purpose                                     |
|-------|-----------------------------------------------------------------------------------------------------------------|---------------------------------------------|
| 1084  | AGGCACAAGTACCAGGTGCTAAAG                                                                                        | Amplification <i>MAL11</i>                  |
| 1148  | GCAAGCTTGCCGGCACTAATTTATTTGACGAG                                                                                | Amplification <i>MAL1</i>                   |
| 1470  | GCGAGTTGCAAGAATCTCTACG                                                                                          | Amplification <i>MAL11</i>                  |
| 1657  | CACCACTAGTATGACTTTAACTAAGCAAACATGCGCC                                                                           | Amplification <i>MAL1</i>                   |
| 6005  | GATCATTATCTTTCACTGCGGAGAAG                                                                                      | Amplification pROS11 backbone               |
| 9457  | TGCGCATGTTTCGGCGTTCGAAACTTCTCCGCAGTGAAAGATAAATGATCCTAGGCTGTCCAAATCCCGGGTTTTAGAGCTAGAAATAGCAAGTTAAATAAG          | Introduction of gRNA- <i>cas9</i> in pROS11 |
| 10813 | TTGGTGTTCCTTTCTGATGTACATAGAGAACATCAAACAACCTAAAAAATAGTATAATGTAAAAGGGTGTTCCTTTTGGGAGAAATAAGGAATCCCTTTGACTGCTCCCAA | Repair fragment <i>MAL11</i>                |
| 10814 | TTTGGGAGCAGTCAAAGGGATTTCCTATTTCTTCCAAAAAACAACCCCTTTACATTATACTATTTTTAGTTGTTTGATGTTCTCTATGTAGCATCAGAAAGAAACACCAA  | Repair fragment <i>MAL11</i>                |
| 12228 | AGAACATCGTAGTGCTTTGTAAGAAGACTGTTAAAGACCCAGTACGAAAATTTCCATAGCCGATAATTGCAGACG                                     | Integration of mRuby2 in <i>FAU1</i>        |
| 12229 | ATGTTCTTGACTATGTAGTACTATATGTCATGTATGAAATATTTGGGTGAGATAATACGTCTCATTGGCAGC                                        | Integration of mRuby2 in <i>FAU1</i>        |
| 12230 | TGCGCATGTTTCGGCGTTCGAAACTTCTCCGCAGTGAAAGATAAATGATCATTACAACTTATACCTGTTTAGAGCTAGAAATAGCAAGTTAAATAAG               | Introduction of gRNA- <i>SIT1</i> in pROS11 |
| 12231 | GGCACAGAATGACTTGCAGC                                                                                            | Amplification <i>SIT1</i> locus             |
| 12232 | AACTGATTGGGGCCACTACG                                                                                            | Amplification <i>SIT1</i> locus             |
| 12233 | AAATGGCAAAAATAAAAATTACTGTACGCTACGCTATCTTTATATAGCTACAAAAATTACAGATGTCAACACAGCTAC                                  | Integration of mTurquoise2 in <i>SIT1</i>   |
| 12234 | TACTTATTTATTTATTTATTTATACAATAGCTGTACCATGTAATAATACATATATGAAATCGTCTCACATCCAGC                                     | Integration of mTurquoise2 in <i>SIT1</i>   |
| 12235 | TGCGCATGTTTCGGCGTTCGAAACTTCTCCGCAGTGAAAGATAAATGATCTCAGGCTCTTTAGTTGATAGTTTTAGAGCTAGAAATAGCAAGTTAAATAAG           | Introduction of gRNA- <i>FAU1</i> in pROS11 |
| 12236 | CTTGCGAACCCGAAGCTTC                                                                                             | Amplification <i>FAU1</i> locus             |
| 12237 | TGCTCTACCAAGAACGCAG                                                                                             | Amplification <i>FAU1</i> locus             |
| 12238 | TTTCAGAGTCTTCAGACTTCTTAACCTCTGTA AAAACAAAAAAGGCATAGCACACTGGCTTAAGATGAC                                          | Integration of Venus in <i>CAN1</i>         |
| 12239 | TATGAGGGTGAGAATGCGAAATGGCGTGGGAATGTGATTAAGGTAATAAACGTCATATCGTCTCATGCTCAGC                                       | Integration of Venus in <i>CAN1</i>         |
| 12805 | TGCGCATGTTTCGGCGTTCGAAACTTCTCCGCAGTGAAAGATAAATGATCTGAAATTAATTGGGACGCAGGTTTTAGAGCTAGAAATAGCAAGTTAAATAAG          | Introduction of gRNA- <i>UTR2</i> in pROS11 |
| 12806 | TGCGCATGTTTCGGCGTTCGAAACTTCTCCGCAGTGAAAGATAAATGATCAACAAAAAGTGTCCATCGAGTTTTAGAGCTAGAAATAGCAAGTTAAATAAG           | Introduction of gRNA- <i>FIR1</i> in pROS11 |
| 12807 | TGCGCATGTTTCGGCGTTCGAAACTTCTCCGCAGTGAAAGATAAATGATCTGACCTGAAGTTGGGCATCAGTTTTAGAGCTAGAAATAGCAAGTTAAATAAG          | Introduction of gRNA- <i>AIM9</i> in pROS11 |
| 12808 | TGCGCATGTTTCGGCGTTCGAAACTTCTCCGCAGTGAAAGATAAATGATCGGAGAGAACATTCATTCTGTTTTAGAGCTAGAAATAGCAAGTTAAATAAG            | Introduction of gRNA- <i>YCK3</i> in pROS11 |
| 12809 | TGCGCATGTTTCGGCGTTCGAAACTTCTCCGCAGTGAAAGATAAATGATCAGTGGAGTAGGTGTGCTTTTTGTTTTAGAGCTAGAAATAGCAAGTTAAATAAG         | Introduction of gRNA-550K in pROS11         |
| 12810 | TGTTCCCTTTGTA AACTTCTATTTATTGTCCTGCA AATAAGCTAATTATATAATTA TACTACTGGCTTAAGATGAC                                 | Integration of Venus in <i>UTR2</i>         |
| 12811 | ATTAATACTTTTTTTT GAGAGTCTGTAGCTATTTGTTCTTAGATGCAGATCCTCCGCTCATGCTCAGC                                           | Integration of Venus in <i>UTR2</i>         |
| 12812 | CCTCTTTCTAATTTAGCACCCGCACACCCGAGCGGTCTGTGATATCCGCATTGGAACACTGGCTTAAGATGAC                                       | Integration of Venus in <i>FIR1</i>         |
| 12813 | CATGCGATGAGCTGGTCAAATCTGTTTACCAGAACAATTTGTAGGGTTTTTTTTTTTCGCTCATGCTCAGC                                         | Integration of Venus in <i>FIR1</i>         |
| 12814 | CAGCGAAGAAGAAGTAGCAAAGCTGTTTAGCAAGCAAGACAGCAATACGAAGACCAAGCCACTGGCTTAAGATGAC                                    | Integration of Venus in <i>AIM9</i>         |
| 12815 | ACGTTATATACAGTTGAGTGAGGTAAGAAACGAAAAATATTTTATTTTAGTATAGAGCTCTCATGCTCAGC                                         | Integration of Venus in <i>AIM9</i>         |
| 12816 | CCGCTAATCAAAAGTGGTATCTCATTCTGAAGAAAAAGTGTAAAAGACGATAAAGGAAAGCACTGGCTTAAGATGAC                                   | Integration of Venus in <i>YCK3</i>         |
| 12817 | AAGGAAACAGCCAATCAAAAAAAGGAAAAAGAGAAAAGTATAAAAAATCGCTTTACGTCTCATGCTCAGC                                          | Integration of Venus in <i>YCK3</i>         |
| 12818 | ATCTCTTATAACAATTTCAAAAAACGTGTGATATGCTTACAATGATCCTATCAATACACTGGCTTAAGATGAC                                       | Integration of Venus in 550K                |
| 12819 | GGAAATAAATCCCTTGATTTAGACGAATACTGTAGAATGCAATAAAGGTTTTGTGATTCGTCTCATGCTCAGC                                       | Integration of Venus in 550K                |

**Table S6: list of SNPs between chromosome VII of CEN.PK113-7D and of S288C**

| Position | In CEN.PK113-7D | In S288C |
|----------|-----------------|----------|
| 125      | ACCCACAC        | A        |
| 1589     | T               | TC       |
| 1740     | TC              | T        |
| 3761     | A               | AT       |
| 4319     | T               | C        |
| 4388     | A               | G        |
| 4772     | A               | G        |
| 5958     | C               | A        |
| 5961     | T               | C        |
| 5978     | G               | A        |
| 5986     | C               | T        |
| 5992     | G               | A        |
| 6008     | T               | C        |
| 6009     | T               | C        |
| 6047     | A               | G        |
| 6052     | AT              | A        |
| 6150     | A               | AG       |
| 6179     | T               | C        |
| 6184     | T               | G        |
| 6206     | T               | C        |
| 6218     | A               | G        |
| 6227     | G               | T        |
| 6236     | A               | G        |
| 6258     | C               | T        |
| 6260     | C               | T        |
| 6821     | C               | T        |
| 6831     | T               | C        |
| 6835     | T               | C        |
| 6840     | C               | T        |
| 6843     | G               | A        |
| 6854     | A               | G        |
| 6937     | A               | G        |
| 6948     | G               | A        |
| 6956     | A               | G        |
| 6957     | T               | C        |
| 6964     | G               | A        |
| 6967     | T               | C        |
| 6990     | G               | T        |
| 6999     | T               | C        |
| 7090     | A               | G        |
| 7095     | T               | C        |
| 7102     | T               | A        |
| 7106     | T               | C        |
| 7107     | G               | T        |
| 7111     | A               | C        |
| 7183     | T               | A        |
| 7185     | C               | T        |

|         |    |
|---------|----|
| 8225 T  | C  |
| 8226 A  | G  |
| 8244 A  | G  |
| 8270 C  | T  |
| 8273 A  | G  |
| 8275 A  | G  |
| 8278 G  | C  |
| 8279 G  | A  |
| 8291 A  | T  |
| 8301 G  | A  |
| 8306 C  | T  |
| 8326 G  | A  |
| 8341 T  | C  |
| 8352 T  | C  |
| 8368 G  | A  |
| 8374 A  | T  |
| 8491 A  | AC |
| 8539 A  | C  |
| 8850 C  | T  |
| 8885 C  | T  |
| 8964 T  | C  |
| 8991 AT | A  |
| 9151 C  | A  |
| 9246 G  | A  |
| 9563 C  | T  |
| 9649 A  | G  |
| 10091 C | T  |
| 10136 G | GA |
| 10236 C | T  |
| 10250 T | C  |
| 10846 C | T  |
| 11163 A | G  |
| 11198 G | A  |
| 11506 T | A  |
| 11925 C | T  |
| 11957 A | T  |
| 12004 A | T  |
| 12035 T | C  |
| 12083 C | T  |
| 12250 C | T  |
| 12353 C | T  |
| 12404 G | A  |
| 12490 C | T  |
| 12499 G | T  |
| 12655 C | T  |
| 12674 A | C  |
| 12743 G | C  |
| 12800 T | C  |
| 13045 A | G  |
| 13060 T | C  |

|           |    |
|-----------|----|
| 13089 T   | G  |
| 13151 G   | T  |
| 13328 A   | G  |
| 13332 C   | A  |
| 13340 A   | C  |
| 13375 C   | A  |
| 13490 A   | G  |
| 13519 C   | T  |
| 13562 C   | A  |
| 13613 C   | T  |
| 13717 T   | A  |
| 13815 A   | T  |
| 13836 T   | C  |
| 13875 T   | C  |
| 13904 T   | C  |
| 13916 T   | C  |
| 13920 CAG | C  |
| 13931 A   | G  |
| 13935 A   | G  |
| 14175 T   | C  |
| 14243 T   | C  |
| 14310 C   | A  |
| 14315 C   | CT |
| 14472 G   | T  |
| 14520 A   | G  |
| 14612 G   | A  |
| 14751 A   | T  |
| 14752 T   | C  |
| 14754 T   | G  |
| 14759 T   | C  |
| 14798 C   | CT |
| 14806 C   | T  |
| 15329 G   | A  |
| 15365 G   | A  |
| 15479 T   | A  |
| 15712 A   | G  |
| 15742 A   | T  |
| 15780 A   | G  |
| 15786 G   | A  |
| 15816 G   | C  |
| 15883 A   | T  |
| 15896 G   | A  |
| 15914 G   | A  |
| 15964 A   | T  |
| 15980 G   | A  |
| 16156 T   | C  |
| 16211 G   | A  |
| 16461 C   | T  |
| 16549 A   | G  |
| 16590 T   | C  |

|               |       |
|---------------|-------|
| 16680 A       | T     |
| 16808 C       | T     |
| 16948 A       | G     |
| 17054 AT      | A     |
| 18048 T       | C     |
| 18303 A       | G     |
| 18383 A       | T     |
| 18901 A       | T     |
| 18994 G       | A     |
| 19018 T       | C     |
| 19079 A       | AT    |
| 19156 T       | A     |
| 19267 T       | A     |
| 19321 A       | G     |
| 19325 A       | G     |
| 19484 A       | C     |
| 19591 C       | T     |
| 19618 A       | C     |
| 19968 A       | G     |
| 20118 C       | T     |
| 20210 A       | C     |
| 20411 A       | AT    |
| 20477 C       | T     |
| 20486 T       | C     |
| 20490 T       | A     |
| 20515 AGAAAAG | A     |
| 20553 CAAAAAA | C     |
| 20645 G       | C     |
| 21175 T       | C     |
| 21592 T       | C     |
| 21642 C       | T     |
| 21745 T       | C     |
| 21768 C       | T     |
| 21790 A       | G     |
| 21841 T       | C     |
| 21895 G       | C     |
| 21984 T       | C     |
| 22136 C       | T     |
| 22295 T       | C     |
| 22316 C       | A     |
| 22320 A       | AATTG |
| 22321 C       | A     |
| 22334 T       | G     |
| 22338 C       | T     |
| 22360 G       | A     |
| 22741 A       | C     |
| 22855 T       | C     |
| 23061 G       | A     |
| 23275 T       | A     |
| 23305 G       | A     |

|          |   |
|----------|---|
| 23311 C  | T |
| 23328 A  | C |
| 23356 T  | C |
| 23369 T  | C |
| 23401 A  | G |
| 23411 A  | G |
| 23478 T  | C |
| 23521 C  | G |
| 23623 A  | T |
| 23650 C  | T |
| 23833 G  | A |
| 24097 A  | G |
| 24130 C  | T |
| 24139 A  | G |
| 24171 T  | C |
| 24288 G  | A |
| 24473 T  | C |
| 24952 C  | T |
| 24953 C  | T |
| 25004 C  | G |
| 25114 C  | T |
| 25211 T  | C |
| 25649 T  | C |
| 25849 A  | G |
| 25881 A  | G |
| 26036 T  | C |
| 26085 G  | A |
| 26099 A  | T |
| 26216 T  | C |
| 26311 T  | C |
| 26376 GA | G |
| 26387 A  | G |
| 26551 T  | A |
| 26570 G  | A |
| 27402 C  | T |
| 27574 A  | G |
| 27658 T  | C |
| 27665 T  | C |
| 32643 G  | A |
| 32652 T  | C |
| 32847 C  | T |
| 33982 C  | A |
| 34324 T  | C |
| 34455 CT | C |
| 34532 G  | A |
| 34763 A  | C |
| 34832 T  | C |
| 35021 G  | A |
| 35031 A  | G |
| 35033 A  | T |



|           |     |
|-----------|-----|
| 35305 TA  | T   |
| 35475 T   | C   |
| 35604 C   | T   |
| 35793 T   | C   |
| 36021 C   | T   |
| 36681 T   | C   |
| 37035 C   | A   |
| 37227 A   | T   |
| 37271 G   | GTT |
| 37539 T   | C   |
| 38016 A   | G   |
| 38387 C   | T   |
| 38421 T   | A   |
| 38519 C   | T   |
| 38727 A   | G   |
| 39656 G   | A   |
| 39696 T   | C   |
| 40158 A   | G   |
| 40284 A   | G   |
| 40631 A   | T   |
| 40845 G   | A   |
| 40874 T   | TAA |
| 40986 G   | GA  |
| 41497 T   | C   |
| 41600 G   | A   |
| 41965 G   | A   |
| 42016 A   | G   |
| 42409 G   | C   |
| 42522 C   | T   |
| 42664 C   | A   |
| 42688 G   | C   |
| 43232 T   | C   |
| 43373 AT  | A   |
| 43396 A   | G   |
| 43468 A   | G   |
| 43822 GTA | G   |
| 44054 C   | T   |
| 44222 T   | C   |
| 44465 T   | C   |
| 44474 G   | A   |
| 44558 G   | A   |
| 44639 A   | G   |
| 44724 T   | C   |
| 44726 G   | A   |
| 44818 G   | A   |
| 44939 A   | G   |
| 45548 C   | T   |
| 45581 G   | T   |
| 45593 C   | T   |
| 45743 G   | A   |

|          |   |
|----------|---|
| 45979 G  | C |
| 46188 C  | T |
| 47413 T  | A |
| 65125 C  | A |
| 68797 A  | G |
| 69601 G  | A |
| 69660 G  | C |
| 69671 C  | G |
| 69672 G  | C |
| 69676 G  | T |
| 69954 A  | G |
| 70017 G  | A |
| 70041 C  | T |
| 70111 GC | G |
| 70161 G  | T |
| 70168 C  | A |
| 70188 T  | C |
| 70202 GT | G |
| 70211 T  | C |
| 70270 T  | C |
| 70419 T  | C |
| 70428 C  | T |
| 70528 G  | T |
| 70965 G  | A |
| 71295 C  | A |
| 71342 GA | G |
| 71448 C  | T |
| 71648 G  | A |
| 71815 C  | T |
| 71875 G  | A |
| 71917 G  | A |
| 71932 C  | A |
| 71949 T  | C |
| 71961 T  | C |
| 72017 A  | G |
| 72025 T  | C |
| 72145 C  | G |
| 72160 C  | T |
| 72242 G  | A |
| 72385 C  | A |
| 72448 A  | G |
| 72454 C  | T |
| 72487 G  | A |
| 72553 T  | C |
| 72556 G  | A |
| 72749 A  | C |
| 72805 G  | T |
| 72934 A  | G |
| 72979 G  | A |
| 73000 C  | A |

|          |      |
|----------|------|
| 73052 G  | A    |
| 73657 G  | T    |
| 73763 G  | C    |
| 73905 T  | C    |
| 73953 G  | T    |
| 73966 A  | T    |
| 74094 A  | G    |
| 74385 C  | T    |
| 74437 CT | C    |
| 74556 T  | C    |
| 74564 C  | G    |
| 74634 A  | G    |
| 74650 T  | C    |
| 75235 G  | T    |
| 75610 C  | T    |
| 76189 G  | A    |
| 76480 C  | A    |
| 76503 C  | T    |
| 76553 A  | G    |
| 76558 T  | C    |
| 76569 G  | T    |
| 76695 G  | T    |
| 76709 G  | A    |
| 76824 C  | A    |
| 76993 G  | A    |
| 77042 T  | C    |
| 77071 C  | G    |
| 77196 A  | C    |
| 77237 C  | A    |
| 77321 G  | A    |
| 77346 G  | A    |
| 77436 G  | A    |
| 77600 A  | G    |
| 78423 A  | G    |
| 78522 T  | C    |
| 78882 T  | C    |
| 79559 G  | C    |
| 79751 T  | C    |
| 79857 G  | T    |
| 79859 G  | C    |
| 80023 C  | T    |
| 80180 T  | TTCA |
| 80195 T  | A    |
| 80246 G  | A    |
| 80270 T  | C    |
| 80357 T  | C    |
| 80377 A  | G    |
| 80469 A  | T    |
| 80505 C  | T    |
| 80510 T  | C    |

|           |                           |
|-----------|---------------------------|
| 80568 A   | G                         |
| 80582 G   | C                         |
| 80587 G   | A                         |
| 80609 T   | C                         |
| 81042 T   | C                         |
| 81044 T   | C                         |
| 81057 G   | A                         |
| 81089 C   | A                         |
| 81093 GAT | G                         |
| 81145 C   | T                         |
| 81266 A   | T                         |
| 81379 A   | T                         |
| 81400 C   | G                         |
| 81448 T   | C                         |
| 81472 A   | G                         |
| 81504 C   | T                         |
| 81520 G   | T                         |
| 81596 G   | A                         |
| 81634 A   | G                         |
| 81680 A   | G                         |
| 81691 G   | C                         |
| 81700 G   | A                         |
| 82012 T   | C                         |
| 82091 G   | A                         |
| 82144 G   | A                         |
| 82157 G   | GTTATTATTATTATTATTGTTATTA |
| 82272 A   | T                         |
| 82295 G   | A                         |
| 82340 G   | A                         |
| 82652 A   | G                         |
| 83201 A   | T                         |
| 83580 A   | T                         |
| 83608 A   | G                         |
| 83721 G   | A                         |
| 83814 G   | T                         |
| 83862 T   | A                         |
| 83867 A   | G                         |
| 83909 G   | A                         |
| 84077 A   | G                         |
| 84106 T   | C                         |
| 84139 C   | CTGT                      |
| 84265 T   | G                         |
| 84409 A   | G                         |
| 84484 T   | C                         |
| 84553 C   | T                         |
| 84628 A   | G                         |
| 85849 T   | A                         |
| 86629 C   | T                         |
| 87125 G   | A                         |
| 88244 C   | T                         |

|             |    |
|-------------|----|
| 88475 C     | T  |
| 89942 T     | G  |
| 89969 A     | T  |
| 91640 T     | C  |
| 91641 T     | C  |
| 91751 G     | A  |
| 92243 A     | G  |
| 92417 T     | A  |
| 92558 T     | C  |
| 92636 T     | C  |
| 92672 A     | G  |
| 92729 T     | C  |
| 97030 T     | C  |
| 97360 T     | G  |
| 98337 A     | G  |
| 98550 A     | C  |
| 98616 G     | A  |
| 98961 G     | A  |
| 99010 GA    | G  |
| 99919 T     | C  |
| 100377 C    | T  |
| 100444 A    | G  |
| 100506 GTCA | G  |
| 100718 G    | GA |
| 100998 A    | G  |
| 101032 T    | A  |
| 101137 A    | T  |
| 101227 AC   | A  |
| 101232 C    | T  |
| 101237 C    | G  |
| 101277 G    | A  |
| 101285 T    | C  |
| 101291 C    | T  |
| 101297 T    | A  |
| 101314 G    | T  |
| 101316 G    | A  |
| 101325 A    | T  |
| 101331 G    | T  |
| 101376 G    | A  |
| 101548 G    | T  |
| 101594 T    | A  |
| 101931 C    | T  |
| 102278 C    | T  |
| 102556 A    | T  |
| 102600 G    | A  |
| 102617 AT   | A  |
| 102733 T    | C  |
| 102934 A    | G  |
| 103099 C    | T  |
| 103117 G    | A  |

|          |            |
|----------|------------|
| 103451 T | G          |
| 103801 C | T          |
| 103913 A | G          |
| 104050 G | A          |
| 110289 T | C          |
| 116874 C | CT         |
| 116875 A | T          |
| 116886 A | G          |
| 116902 T | C          |
| 116910 C | T          |
| 116941 A | G          |
| 116999 A | G          |
| 117490 A | G          |
| 117557 T | G          |
| 133478 C | CAT        |
| 143879 T | TAATAATAAC |
| 160912 C | T          |
| 184766 C | T          |
| 184771 G | A          |
| 184812 G | C          |
| 184859 G | A          |
| 184929 G | A          |
| 185170 C | T          |
| 185193 C | A          |
| 185586 C | T          |
| 186657 T | C          |
| 186885 C | T          |
| 187181 C | G          |
| 187326 G | A          |
| 187493 T | C          |
| 187512 T | C          |
| 187524 C | T          |
| 187551 G | A          |
| 187693 G | T          |
| 187714 G | A          |
| 187929 C | T          |
| 187973 T | G          |
| 188026 C | T          |
| 188058 T | C          |
| 188148 A | G          |
| 188170 T | C          |
| 188211 C | A          |
| 188259 A | G          |
| 188368 A | G          |
| 188384 A | T          |
| 188421 C | T          |
| 188461 T | C          |
| 188469 C | G          |
| 188533 G | A          |
| 188544 C | T          |



|           |               |
|-----------|---------------|
| 188547 C  | T             |
| 188550 A  | G             |
| 188581 T  | C             |
| 188607 G  | A             |
| 188653 T  | A             |
| 188676 A  | T             |
| 188686 AC | A             |
| 188708 T  | C             |
| 188720 A  | T             |
| 188727 G  | C             |
| 188741 G  | A             |
| 188788 C  | T             |
| 188823 T  | TTGCCTAGAACAA |
| 188830 G  | A             |
| 188907 C  | T             |
| 188909 C  | T             |
| 188931 A  | G             |
| 188942 T  | C             |
| 189045 G  | A             |
| 189326 G  | A             |
| 189623 C  | T             |
| 189665 A  | G             |
| 189666 T  | C             |
| 189992 C  | T             |
| 190553 G  | A             |
| 190961 G  | A             |
| 191246 T  | C             |
| 191896 T  | C             |
| 191900 A  | T             |
| 196541 T  | C             |
| 196637 G  | A             |
| 196656 G  | A             |
| 196721 G  | T             |
| 196763 C  | G             |
| 196766 C  | T             |
| 196866 C  | T             |
| 197081 G  | A             |
| 197087 A  | G             |
| 197162 T  | C             |
| 197243 C  | T             |
| 197246 C  | T             |
| 197276 G  | A             |
| 197282 A  | G             |
| 197380 G  | C             |
| 197417 T  | C             |
| 197444 T  | C             |
| 197445 C  | T             |
| 197460 A  | T             |
| 197850 C  | T             |
| 197853 T  | C             |

|           |   |
|-----------|---|
| 197969 T  | A |
| 197970 C  | T |
| 198012 A  | G |
| 198189 G  | A |
| 198219 C  | T |
| 198282 G  | A |
| 198360 A  | G |
| 198618 A  | G |
| 198684 G  | C |
| 198783 A  | C |
| 198993 A  | G |
| 199405 C  | T |
| 199496 G  | A |
| 199536 T  | G |
| 199608 TA | T |
| 199668 TC | T |
| 199734 G  | A |
| 199773 C  | T |
| 199831 A  | G |
| 199968 T  | C |
| 200922 C  | T |
| 201263 T  | A |
| 201606 T  | C |
| 201628 G  | T |
| 201720 A  | G |
| 201777 C  | T |
| 202097 T  | A |
| 202337 T  | C |
| 202451 G  | T |
| 202595 A  | G |
| 202748 T  | C |
| 202857 C  | T |
| 203041 A  | T |
| 203101 A  | G |
| 203154 C  | T |
| 203183 C  | T |
| 203339 T  | C |
| 203381 T  | C |
| 203704 G  | A |
| 204080 G  | A |
| 204095 C  | T |
| 204107 T  | C |
| 204146 C  | T |
| 214818 T  | C |
| 215621 T  | G |
| 215762 T  | C |
| 215928 C  | G |
| 215953 A  | G |
| 216006 C  | T |
| 216072 A  | G |

|          |    |
|----------|----|
| 216096 G | A  |
| 216310 G | A  |
| 216360 A | G  |
| 216993 A | G  |
| 217080 A | G  |
| 217130 G | C  |
| 217338 C | T  |
| 217458 G | C  |
| 217602 T | C  |
| 217767 G | A  |
| 217908 C | T  |
| 218163 A | T  |
| 218574 A | AC |
| 218645 C | T  |
| 218880 A | G  |
| 218997 A | G  |
| 219121 C | A  |
| 219357 G | C  |
| 220098 C | T  |
| 220124 T | C  |
| 220149 A | G  |
| 220174 T | C  |
| 220227 C | T  |
| 220233 C | T  |
| 220278 T | A  |
| 220471 T | C  |
| 220476 C | T  |
| 220827 A | G  |
| 220941 C | T  |
| 220976 T | C  |
| 221034 G | A  |
| 221494 A | G  |
| 221588 T | G  |
| 221841 G | A  |
| 222262 T | TA |
| 222273 G | A  |
| 222405 G | T  |
| 222553 T | C  |
| 222566 A | G  |
| 222677 A | C  |
| 222694 G | C  |
| 222859 G | T  |
| 223074 G | A  |
| 223149 C | T  |
| 223157 A | C  |
| 223160 C | A  |
| 223261 G | A  |
| 223297 G | A  |
| 223339 A | G  |
| 223412 C | A  |

|                |    |
|----------------|----|
| 223459 A       | T  |
| 223718 C       | T  |
| 223808 A       | G  |
| 223871 A       | G  |
| 223889 C       | G  |
| 223994 ATTTT   | A  |
| 224035 T       | C  |
| 224044 A       | G  |
| 224112 T       | C  |
| 224122 C       | T  |
| 224123 A       | C  |
| 224673 A       | G  |
| 225147 G       | A  |
| 225399 C       | G  |
| 225552 A       | G  |
| 226100 T       | C  |
| 226268 A       | G  |
| 226284 G       | A  |
| 226315 T       | TC |
| 226355 A       | T  |
| 226648 G       | A  |
| 226652 TTATATA | T  |
| 226717 G       | A  |
| 227223 A       | G  |
| 227277 C       | T  |
| 227376 A       | G  |
| 227737 T       | C  |
| 227980 G       | A  |
| 227981 T       | C  |
| 228118 C       | T  |
| 228148 A       | G  |
| 228203 C       | T  |
| 228217 C       | T  |
| 228259 A       | G  |
| 228277 G       | A  |
| 228410 C       | T  |
| 228516 C       | T  |
| 228712 A       | G  |
| 228880 T       | G  |
| 228988 A       | G  |
| 228991 C       | A  |
| 229268 A       | T  |
| 229587 G       | A  |
| 229614 A       | G  |
| 229650 G       | A  |
| 229819 T       | A  |
| 229995 G       | A  |
| 230141 G       | A  |
| 230369 T       | C  |
| 230445 C       | T  |

|          |      |
|----------|------|
| 230471 G | A    |
| 230479 A | G    |
| 230654 T | C    |
| 231084 T | C    |
| 231220 T | C    |
| 231282 C | T    |
| 231297 T | C    |
| 231459 G | A    |
| 231760 T | C    |
| 231785 A | G    |
| 231790 T | C    |
| 231799 T | G    |
| 231903 T | A    |
| 231972 G | C    |
| 232258 A | G    |
| 232284 T | C    |
| 232597 A | G    |
| 232765 A | G    |
| 232876 G | A    |
| 233063 A | G    |
| 233114 A | G    |
| 233157 C | CTTT |
| 233221 G | A    |
| 233237 C | G    |
| 233265 A | G    |
| 233272 G | C    |
| 233453 C | T    |
| 233675 A | G    |
| 233742 T | A    |
| 233747 C | T    |
| 234128 C | T    |
| 234229 G | A    |
| 235112 A | G    |
| 235172 C | T    |
| 235192 T | C    |
| 235393 G | C    |
| 235452 G | A    |
| 235499 C | T    |
| 235527 A | G    |
| 235617 T | A    |
| 235622 A | G    |
| 235624 C | A    |
| 235800 C | T    |
| 235804 A | G    |
| 236368 C | T    |
| 236515 C | T    |
| 236646 G | A    |
| 236685 G | A    |
| 237075 G | A    |
| 237545 A | G    |

|           |    |
|-----------|----|
| 238064 TG | T  |
| 238267 A  | G  |
| 238355 C  | G  |
| 238926 T  | C  |
| 239070 CT | C  |
| 239188 A  | G  |
| 239850 A  | G  |
| 240043 G  | A  |
| 240081 C  | T  |
| 240113 T  | C  |
| 240657 T  | C  |
| 240685 C  | G  |
| 240691 T  | C  |
| 240750 G  | A  |
| 240824 A  | G  |
| 240883 T  | C  |
| 240884 T  | C  |
| 240910 C  | T  |
| 240961 T  | C  |
| 240962 A  | C  |
| 240975 G  | T  |
| 241071 G  | A  |
| 241168 T  | C  |
| 241420 G  | A  |
| 241606 A  | G  |
| 241639 A  | G  |
| 241836 G  | T  |
| 241922 G  | A  |
| 241934 A  | G  |
| 241959 A  | G  |
| 241984 A  | G  |
| 242131 G  | A  |
| 242200 A  | G  |
| 242246 G  | A  |
| 242397 T  | C  |
| 242453 GA | G  |
| 242842 A  | G  |
| 243021 C  | T  |
| 243029 A  | G  |
| 243066 G  | A  |
| 243103 C  | T  |
| 243223 G  | C  |
| 243247 T  | A  |
| 243275 C  | T  |
| 243299 G  | GT |
| 243317 G  | A  |
| 243322 A  | T  |
| 243333 C  | T  |
| 243342 A  | G  |
| 243551 T  | TG |

|               |   |
|---------------|---|
| 243553 A      | G |
| 243661 C      | T |
| 243694 A      | G |
| 243767 G      | A |
| 243776 A      | G |
| 243800 T      | A |
| 243950 G      | C |
| 243995 G      | A |
| 244017 C      | A |
| 244159 C      | T |
| 244231 C      | T |
| 244576 CCGCTT | C |
| 244582 T      | A |
| 244648 TATC   | T |
| 244716 A      | C |
| 244741 T      | A |
| 245166 G      | A |
| 245253 A      | T |
| 245499 T      | C |
| 245698 A      | G |
| 245700 A      | G |
| 245704 C      | T |
| 245757 C      | T |
| 245916 T      | C |
| 245932 G      | A |
| 246250 A      | G |
| 246348 A      | G |
| 246494 TTTC   | T |
| 246707 C      | G |
| 246968 C      | T |
| 247046 C      | T |
| 247047 T      | C |
| 247350 C      | A |
| 247394 G      | C |
| 247440 C      | T |
| 247456 C      | T |
| 247568 T      | C |
| 247697 C      | G |
| 247724 AT     | A |
| 247759 A      | G |
| 247760 A      | G |
| 248000 A      | G |
| 248135 C      | T |
| 248180 T      | A |
| 248603 A      | G |
| 248834 G      | A |
| 248960 A      | G |
| 249139 G      | A |
| 249193 A      | G |
| 249215 GC     | G |

|                   |    |
|-------------------|----|
| 249390 T          | C  |
| 249527 G          | A  |
| 249559 G          | T  |
| 249624 G          | A  |
| 249690 G          | A  |
| 249702 G          | GA |
| 249710 G          | A  |
| 249841 C          | T  |
| 249904 T          | TA |
| 249905 G          | T  |
| 249989 A          | G  |
| 250023 A          | G  |
| 250043 C          | T  |
| 250064 TC         | T  |
| 250101 A          | G  |
| 250123 T          | C  |
| 250180 T          | TG |
| 250201 G          | A  |
| 250213 C          | T  |
| 250362 C          | A  |
| 250377 C          | T  |
| 250479 T          | C  |
| 250569 T          | C  |
| 250571 A          | C  |
| 250619 GGTATACCTT | G  |
| 251040 T          | A  |
| 251079 A          | C  |
| 251105 A          | G  |
| 251137 C          | T  |
| 251224 C          | T  |
| 251538 G          | C  |
| 251568 A          | G  |
| 251799 T          | C  |
| 251811 G          | A  |
| 251841 A          | G  |
| 251854 T          | C  |
| 251893 C          | T  |
| 252093 G          | GA |
| 252112 C          | T  |
| 252252 A          | G  |
| 252318 G          | C  |
| 252456 A          | T  |
| 252501 C          | T  |
| 252603 A          | G  |
| 252634 A          | C  |
| 253119 T          | C  |
| 253173 A          | G  |
| 253188 G          | A  |
| 253602 T          | C  |
| 253722 C          | T  |



|           |             |
|-----------|-------------|
| 253908 A  | G           |
| 254174 A  | G           |
| 254450 AG | A           |
| 254452 G  | T           |
| 254461 C  | T           |
| 254553 G  | T           |
| 254617 C  | T           |
| 254736 A  | T           |
| 254806 A  | T           |
| 254923 A  | G           |
| 255000 GA | G           |
| 255122 A  | G           |
| 255184 T  | G           |
| 255200 T  | C           |
| 255224 T  | G           |
| 255227 A  | G           |
| 255287 A  | G           |
| 255371 T  | C           |
| 255653 C  | A           |
| 255877 A  | G           |
| 255947 T  | C           |
| 256036 G  | A           |
| 256235 C  | T           |
| 256565 G  | A           |
| 256581 C  | G           |
| 256692 C  | T           |
| 256836 G  | GTATATATATA |
| 257333 G  | A           |
| 258885 G  | A           |
| 259013 T  | C           |
| 259055 T  | G           |
| 259076 G  | A           |
| 259190 A  | G           |
| 259827 G  | A           |
| 260071 C  | T           |
| 260271 G  | GA          |
| 260802 T  | C           |
| 260860 G  | A           |
| 261044 T  | C           |
| 261208 C  | T           |
| 261231 TA | T           |
| 261268 C  | T           |
| 261439 T  | C           |
| 261596 A  | G           |
| 261727 T  | A           |
| 261833 T  | C           |
| 261866 C  | CA          |
| 261878 C  | A           |
| 261995 A  | T           |
| 262148 GT | G           |

|           |    |
|-----------|----|
| 262309 A  | G  |
| 262325 C  | CT |
| 262486 T  | C  |
| 262544 G  | A  |
| 262554 A  | T  |
| 262563 T  | C  |
| 262733 G  | A  |
| 262983 T  | A  |
| 263318 C  | T  |
| 263398 G  | A  |
| 263907 A  | C  |
| 264070 C  | T  |
| 264154 T  | A  |
| 264269 T  | TG |
| 264512 T  | C  |
| 264625 C  | T  |
| 264984 T  | C  |
| 264998 A  | G  |
| 265042 A  | T  |
| 265105 TA | T  |
| 265189 A  | G  |
| 265259 T  | G  |
| 265369 AT | A  |
| 266055 C  | T  |
| 266145 T  | C  |
| 266203 T  | G  |
| 266331 T  | C  |
| 266389 C  | A  |
| 266398 A  | G  |
| 266459 C  | T  |
| 266517 C  | T  |
| 266739 T  | C  |
| 266768 C  | CT |
| 266787 T  | C  |
| 266904 T  | C  |
| 266934 TG | T  |
| 267002 T  | C  |
| 267052 C  | T  |
| 267073 A  | G  |
| 267132 C  | T  |
| 267226 A  | G  |
| 267229 G  | A  |
| 267235 G  | A  |
| 267244 A  | C  |
| 267336 G  | A  |
| 267358 A  | G  |
| 267514 G  | A  |
| 267613 G  | A  |
| 267616 G  | A  |
| 267622 A  | G  |

|           |     |
|-----------|-----|
| 267659 A  | G   |
| 267790 T  | C   |
| 267840 C  | T   |
| 268195 A  | G   |
| 268753 T  | C   |
| 268940 A  | G   |
| 269113 A  | G   |
| 269229 T  | C   |
| 269364 CT | C   |
| 269496 C  | T   |
| 269551 C  | A   |
| 269574 G  | A   |
| 269581 T  | C   |
| 269593 C  | T   |
| 269615 T  | TC  |
| 269625 A  | T   |
| 269638 T  | A   |
| 269639 C  | G   |
| 269642 T  | G   |
| 269657 G  | A   |
| 269675 G  | GAA |
| 269740 A  | G   |
| 269753 C  | T   |
| 269921 G  | A   |
| 270496 A  | G   |
| 270563 T  | A   |
| 270586 A  | T   |
| 270727 T  | A   |
| 270967 C  | CT  |
| 270979 A  | C   |
| 270986 C  | T   |
| 271648 A  | T   |
| 271690 T  | C   |
| 271715 C  | T   |
| 271728 C  | T   |
| 271832 C  | T   |
| 271845 G  | A   |
| 271846 A  | T   |
| 271847 C  | T   |
| 271880 A  | G   |
| 271887 A  | G   |
| 271922 A  | G   |
| 272053 C  | T   |
| 272207 A  | G   |
| 272216 G  | A   |
| 272447 C  | T   |
| 272538 T  | C   |
| 272638 G  | A   |
| 272682 C  | T   |
| 272769 A  | T   |

|           |     |
|-----------|-----|
| 272772 C  | T   |
| 272916 A  | G   |
| 273071 GT | G   |
| 273222 T  | C   |
| 273310 A  | G   |
| 273980 T  | C   |
| 274109 C  | G   |
| 274234 A  | T   |
| 274649 T  | A   |
| 274665 G  | A   |
| 274669 G  | GAA |
| 274704 A  | G   |
| 274871 C  | CT  |
| 274965 A  | G   |
| 274969 A  | T   |
| 275263 A  | G   |
| 275667 T  | C   |
| 275913 C  | T   |
| 276427 G  | A   |
| 276480 A  | T   |
| 276677 G  | A   |
| 276719 A  | C   |
| 277095 C  | T   |
| 277129 T  | G   |
| 277267 C  | T   |
| 277309 C  | A   |
| 277508 T  | C   |
| 277513 T  | C   |
| 277737 A  | G   |
| 278230 G  | A   |
| 278457 G  | A   |
| 278464 A  | G   |
| 278466 G  | A   |
| 278479 C  | T   |
| 278482 T  | C   |
| 278608 T  | C   |
| 278784 G  | GAT |
| 278964 T  | C   |
| 279310 T  | C   |
| 279989 G  | A   |
| 280234 T  | A   |
| 280415 T  | C   |
| 280546 A  | G   |
| 280558 G  | A   |
| 280726 T  | C   |
| 280731 A  | G   |
| 281237 C  | A   |
| 281288 C  | T   |
| 281309 A  | T   |
| 281334 A  | G   |

|            |           |
|------------|-----------|
| 281467 T   | C         |
| 281572 G   | A         |
| 281622 A   | G         |
| 281650 G   | GC        |
| 281687 G   | A         |
| 281744 G   | GGA       |
| 281794 C   | T         |
| 281844 T   | C         |
| 281934 G   | A         |
| 282092 G   | A         |
| 282150 T   | C         |
| 282189 C   | T         |
| 282400 A   | G         |
| 282496 C   | T         |
| 282730 C   | T         |
| 282882 T   | C         |
| 283140 A   | G         |
| 283242 C   | A         |
| 283358 T   | C         |
| 283387 G   | A         |
| 283446 A   | G         |
| 283532 A   | G         |
| 283799 C   | T         |
| 283857 C   | T         |
| 283891 A   | G         |
| 283929 C   | T         |
| 284038 G   | T         |
| 284140 T   | C         |
| 284668 T   | C         |
| 284695 T   | A         |
| 284767 A   | G         |
| 284921 C   | CGTGTGTGT |
| 285098 C   | T         |
| 285165 A   | G         |
| 285503 C   | T         |
| 285547 GAA | G         |
| 285601 A   | G         |
| 286225 C   | T         |
| 286525 T   | C         |
| 287129 A   | G         |
| 287249 A   | G         |
| 287375 T   | C         |
| 287453 T   | G         |
| 287454 A   | G         |
| 287786 T   | G         |
| 287862 T   | C         |
| 287889 C   | CT        |
| 288083 C   | T         |
| 288085 G   | T         |
| 288145 A   | G         |

|          |     |
|----------|-----|
| 288160 A | G   |
| 288196 T | G   |
| 288282 A | G   |
| 288418 C | T   |
| 288702 C | T   |
| 288787 C | T   |
| 288817 G | C   |
| 288827 T | C   |
| 288865 T | C   |
| 289231 G | A   |
| 289298 T | C   |
| 289476 A | G   |
| 289520 A | G   |
| 289573 G | C   |
| 289574 T | G   |
| 289707 G | A   |
| 289730 A | AT  |
| 289924 T | C   |
| 289962 C | T   |
| 290094 A | T   |
| 290130 G | GTT |
| 290141 G | T   |
| 290255 T | C   |
| 290363 T | G   |
| 290372 A | G   |
| 290391 G | A   |
| 290540 T | C   |
| 290675 T | C   |
| 290679 C | T   |
| 290706 A | T   |
| 290903 T | C   |
| 290996 C | T   |
| 291012 A | G   |
| 291288 A | G   |
| 291751 A | C   |
| 291822 G | A   |
| 292115 C | CT  |
| 292470 G | A   |
| 292555 G | A   |
| 292559 A | G   |
| 293180 T | A   |
| 293252 G | A   |
| 294447 C | A   |
| 294563 C | T   |
| 294594 G | A   |
| 294942 A | G   |
| 295196 G | T   |
| 295423 T | C   |
| 295725 A | AT  |
| 296331 A | G   |

|             |     |
|-------------|-----|
| 297042 G    | A   |
| 297198 G    | A   |
| 297452 T    | C   |
| 297996 A    | G   |
| 298008 C    | G   |
| 298297 A    | G   |
| 298350 C    | T   |
| 298487 C    | T   |
| 298671 G    | A   |
| 299019 C    | T   |
| 299224 G    | A   |
| 299312 G    | A   |
| 299372 C    | CT  |
| 299606 G    | A   |
| 299663 T    | G   |
| 299666 T    | C   |
| 299699 T    | C   |
| 299717 A    | G   |
| 299813 A    | G   |
| 300275 C    | T   |
| 300353 C    | A   |
| 300749 A    | T   |
| 301218 A    | G   |
| 301454 T    | C   |
| 301571 A    | G   |
| 301691 C    | T   |
| 301997 G    | C   |
| 302042 A    | G   |
| 302127 ATTC | A   |
| 302313 C    | G   |
| 302340 G    | A   |
| 302350 A    | C   |
| 302382 T    | C   |
| 302473 C    | T   |
| 302961 T    | C   |
| 302992 C    | T   |
| 303138 C    | T   |
| 303244 T    | C   |
| 303760 A    | T   |
| 303847 G    | GT  |
| 303853 A    | G   |
| 303856 G    | A   |
| 303899 T    | TA  |
| 303925 C    | T   |
| 303956 G    | A   |
| 303966 C    | T   |
| 303968 G    | A   |
| 303975 T    | A   |
| 304002 C    | T   |
| 304005 A    | ATT |

|             |        |
|-------------|--------|
| 304039 T    | C      |
| 304136 A    | AT     |
| 304256 G    | A      |
| 304702 C    | T      |
| 304750 C    | T      |
| 305008 G    | A      |
| 305089 A    | G      |
| 305414 T    | C      |
| 305428 T    | C      |
| 305461 C    | T      |
| 305476 T    | C      |
| 306167 T    | C      |
| 306397 T    | TA     |
| 306650 A    | G      |
| 307844 G    | A      |
| 308439 T    | C      |
| 308441 A    | G      |
| 308461 G    | GTTT   |
| 308569 G    | A      |
| 308593 A    | G      |
| 308610 T    | C      |
| 308639 G    | GT     |
| 309008 G    | A      |
| 309167 T    | C      |
| 309242 A    | G      |
| 309348 G    | A      |
| 309461 A    | G      |
| 309476 ATCG | A      |
| 309500 G    | A      |
| 309590 G    | C      |
| 309630 G    | A      |
| 309880 A    | T      |
| 309932 G    | A      |
| 309965 G    | A      |
| 310108 T    | C      |
| 310421 T    | A      |
| 310635 T    | C      |
| 311000 G    | A      |
| 311556 T    | C      |
| 311726 C    | A      |
| 311768 C    | G      |
| 311776 G    | A      |
| 311883 G    | A      |
| 311975 C    | T      |
| 312176 A    | G      |
| 312184 C    | CTGGTT |
| 312199 T    | C      |
| 312244 G    | C      |
| 312292 G    | A      |
| 312297 T    | C      |



|              |   |
|--------------|---|
| 312355 C     | G |
| 312424 C     | A |
| 312451 A     | G |
| 312462 C     | T |
| 312471 C     | A |
| 312566 A     | G |
| 312575 T     | C |
| 312580 T     | C |
| 312588 T     | C |
| 312589 C     | T |
| 312631 A     | G |
| 313014 A     | G |
| 313021 G     | C |
| 313022 G     | A |
| 313117 G     | A |
| 313137 G     | A |
| 313145 C     | T |
| 313262 G     | A |
| 313292 T     | A |
| 313293 G     | A |
| 313385 T     | C |
| 313433 G     | T |
| 313474 A     | G |
| 313528 A     | G |
| 313583 G     | A |
| 313607 T     | C |
| 313753 G     | T |
| 313769 C     | T |
| 313887 T     | C |
| 313897 T     | G |
| 313933 G     | A |
| 313944 A     | C |
| 314003 A     | C |
| 314092 C     | T |
| 314140 G     | A |
| 314206 G     | A |
| 314231 T     | C |
| 314270 A     | G |
| 314304 T     | C |
| 314313 ATTGC | A |
| 314414 C     | A |
| 314420 C     | T |
| 314517 T     | C |
| 314621 C     | G |
| 314662 C     | T |
| 314677 T     | C |
| 314706 C     | T |
| 314734 G     | A |
| 314738 G     | A |
| 314777 C     | T |

|          |    |
|----------|----|
| 314833 C | A  |
| 314843 C | CA |
| 314847 G | A  |
| 314960 T | C  |
| 315070 A | G  |
| 315087 T | C  |
| 315257 C | CA |
| 315388 T | C  |
| 315431 C | T  |
| 315576 T | G  |
| 316215 T | C  |
| 316656 G | T  |
| 316775 A | T  |
| 316885 C | T  |
| 317018 G | A  |
| 317021 T | C  |
| 317160 A | G  |
| 317355 G | C  |
| 317480 C | G  |
| 317508 A | AT |
| 317838 G | A  |
| 318076 G | A  |
| 318157 G | A  |
| 318214 A | G  |
| 318538 T | G  |
| 318600 T | A  |
| 318643 A | G  |
| 318814 G | A  |
| 319107 C | T  |
| 319212 T | C  |
| 319362 A | T  |
| 319576 C | T  |
| 319888 G | A  |
| 320202 A | C  |
| 320437 T | TA |
| 320768 A | G  |
| 320850 A | G  |
| 321098 C | T  |
| 321345 C | T  |
| 321362 G | A  |
| 321779 A | T  |
| 321843 T | A  |
| 321923 C | T  |
| 321965 C | T  |
| 321977 A | G  |
| 322010 C | T  |
| 322076 T | A  |
| 322198 C | T  |
| 322280 C | T  |
| 322421 T | G  |

|              |    |
|--------------|----|
| 322576 G     | A  |
| 322580 T     | C  |
| 322616 T     | C  |
| 322629 A     | G  |
| 322670 C     | T  |
| 322686 C     | T  |
| 322698 T     | G  |
| 322733 A     | T  |
| 322755 C     | T  |
| 322774 G     | A  |
| 322780 A     | G  |
| 322788 A     | G  |
| 322893 C     | T  |
| 323290 GA    | G  |
| 323352 C     | G  |
| 323673 C     | T  |
| 323876 T     | C  |
| 324919 G     | A  |
| 324920 G     | C  |
| 325207 G     | A  |
| 326143 G     | A  |
| 326458 C     | T  |
| 326755 T     | A  |
| 326828 GTTTC | G  |
| 327026 A     | G  |
| 327224 G     | C  |
| 327791 T     | C  |
| 327800 T     | C  |
| 327860 G     | A  |
| 327880 C     | T  |
| 328164 C     | A  |
| 328253 T     | C  |
| 328771 A     | G  |
| 328845 A     | G  |
| 328969 A     | C  |
| 328970 T     | C  |
| 328973 G     | A  |
| 328977 G     | C  |
| 329067 T     | A  |
| 329072 A     | G  |
| 329074 G     | C  |
| 329121 G     | GA |
| 329122 G     | A  |
| 329170 T     | A  |
| 329870 A     | G  |
| 329909 G     | C  |
| 330530 T     | C  |
| 331090 A     | G  |
| 331150 ATT   | A  |
| 331317 T     | C  |

|          |    |
|----------|----|
| 331355 G | A  |
| 331755 C | T  |
| 333021 C | T  |
| 333193 T | C  |
| 333262 T | C  |
| 333284 A | G  |
| 333794 G | GA |
| 333915 G | A  |
| 333950 A | AT |
| 333960 T | A  |
| 333964 C | T  |
| 334051 A | G  |
| 334108 T | C  |
| 334111 T | C  |
| 334117 G | C  |
| 334253 A | G  |
| 334469 G | C  |
| 334488 G | A  |
| 334831 G | A  |
| 334915 G | A  |
| 334975 C | A  |
| 335008 G | A  |
| 335016 T | C  |
| 335074 G | T  |
| 335131 C | T  |
| 335260 C | T  |
| 335476 C | T  |
| 335547 C | T  |
| 335550 T | C  |
| 335865 T | C  |
| 336054 T | C  |
| 336062 A | G  |
| 336110 G | C  |
| 336152 T | A  |
| 336162 T | A  |
| 336173 C | T  |
| 336261 T | C  |
| 336367 T | C  |
| 336461 T | G  |
| 336487 T | C  |
| 336612 C | T  |
| 336674 T | C  |
| 337037 A | G  |
| 337349 T | C  |
| 337502 G | A  |
| 337736 C | T  |
| 337739 C | T  |
| 338081 C | G  |
| 338165 G | T  |
| 338252 G | GA |

|           |    |
|-----------|----|
| 338471 C  | T  |
| 338495 A  | AT |
| 338546 G  | A  |
| 338623 A  | G  |
| 338628 C  | T  |
| 338661 G  | A  |
| 339067 C  | T  |
| 339106 G  | A  |
| 339314 A  | C  |
| 339430 A  | G  |
| 339571 T  | A  |
| 339911 T  | C  |
| 340042 G  | A  |
| 340123 T  | C  |
| 340264 G  | A  |
| 340268 T  | TA |
| 340290 C  | T  |
| 340352 T  | C  |
| 340371 C  | T  |
| 340401 C  | CA |
| 340431 G  | T  |
| 340756 G  | A  |
| 340867 C  | T  |
| 341088 C  | T  |
| 341575 A  | G  |
| 341935 G  | A  |
| 342466 T  | C  |
| 342484 G  | A  |
| 342853 T  | C  |
| 343333 A  | G  |
| 343463 AT | A  |
| 343528 A  | C  |
| 343742 T  | C  |
| 343913 T  | C  |
| 344030 T  | C  |
| 344060 T  | C  |
| 344147 T  | C  |
| 344968 G  | C  |
| 345104 G  | A  |
| 345371 A  | G  |
| 346001 A  | G  |
| 346075 G  | A  |
| 346642 A  | G  |
| 346922 C  | T  |
| 347114 T  | C  |
| 347202 G  | T  |
| 347222 G  | A  |
| 347504 T  | C  |
| 347763 T  | C  |
| 347768 A  | T  |

|          |            |
|----------|------------|
| 347942 G | C          |
| 347999 A | T          |
| 348164 C | T          |
| 348507 T | C          |
| 348751 G | A          |
| 348807 C | G          |
| 348810 C | T          |
| 349012 G | A          |
| 349046 T | G          |
| 349175 C | A          |
| 349216 G | A          |
| 349494 T | G          |
| 349577 A | G          |
| 349903 T | C          |
| 350081 T | C          |
| 350142 A | ATT        |
| 350209 A | G          |
| 350229 T | C          |
| 350244 C | A          |
| 350377 C | T          |
| 350488 T | C          |
| 350671 C | T          |
| 350895 G | A          |
| 350975 A | G          |
| 350996 G | A          |
| 351065 G | A          |
| 351311 C | T          |
| 351338 A | G          |
| 351536 T | C          |
| 351542 C | T          |
| 351866 A | G          |
| 351879 A | T          |
| 351893 C | T          |
| 352074 G | A          |
| 352300 T | C          |
| 352371 G | GT         |
| 352401 A | AAAAAAGAAT |
| 352560 A | G          |
| 353055 C | T          |
| 353058 G | A          |
| 353239 G | A          |
| 353359 A | T          |
| 353536 T | A          |
| 354059 G | GT         |
| 354191 T | C          |
| 354230 G | T          |
| 354283 T | G          |
| 354319 G | A          |
| 354367 A | C          |
| 354427 G | T          |

|           |    |
|-----------|----|
| 354438 A  | G  |
| 354467 A  | G  |
| 354471 T  | C  |
| 354638 A  | C  |
| 354759 C  | T  |
| 354784 T  | C  |
| 356109 C  | T  |
| 356121 T  | A  |
| 356262 A  | G  |
| 356274 G  | T  |
| 356577 G  | T  |
| 356598 A  | G  |
| 356955 C  | T  |
| 356972 G  | A  |
| 357115 T  | C  |
| 357117 A  | G  |
| 357164 T  | G  |
| 357186 A  | G  |
| 357327 C  | T  |
| 357438 A  | G  |
| 357534 C  | T  |
| 357564 G  | A  |
| 357589 G  | A  |
| 358310 G  | A  |
| 358343 A  | G  |
| 358404 G  | A  |
| 358485 T  | C  |
| 358628 T  | C  |
| 358646 C  | CT |
| 358796 A  | AT |
| 358823 A  | T  |
| 359107 A  | G  |
| 359782 G  | A  |
| 359858 A  | T  |
| 359964 A  | G  |
| 360042 T  | C  |
| 360765 C  | T  |
| 360997 G  | A  |
| 361068 A  | C  |
| 361091 TA | T  |
| 361250 AT | A  |
| 361308 G  | A  |
| 361647 C  | G  |
| 361995 C  | T  |
| 362657 T  | G  |
| 362712 G  | A  |
| 362946 T  | C  |
| 362957 G  | A  |
| 363048 C  | T  |
| 363057 A  | G  |

|            |            |
|------------|------------|
| 363095 A   | G          |
| 363096 T   | A          |
| 363112 A   | AAT        |
| 363666 G   | GTACTGCAAT |
| 363706 C   | T          |
| 363746 T   | C          |
| 363767 C   | T          |
| 363987 C   | T          |
| 364577 C   | T          |
| 364737 T   | C          |
| 364803 A   | T          |
| 364826 T   | C          |
| 364894 T   | C          |
| 364940 A   | G          |
| 365209 A   | G          |
| 365237 A   | G          |
| 366583 C   | T          |
| 366781 C   | T          |
| 367029 A   | G          |
| 367201 C   | T          |
| 367268 T   | A          |
| 367310 T   | C          |
| 367399 ATT | A          |
| 367928 G   | A          |
| 368255 T   | G          |
| 368418 A   | G          |
| 368491 C   | T          |
| 368532 A   | G          |
| 368930 T   | C          |
| 369452 G   | A          |
| 369517 T   | C          |
| 369603 G   | T          |
| 369866 T   | C          |
| 370183 A   | G          |
| 370218 G   | T          |
| 370336 T   | C          |
| 370909 A   | G          |
| 370999 A   | G          |
| 371014 T   | A          |
| 371032 G   | A          |
| 371062 C   | T          |
| 371092 T   | C          |
| 371113 T   | C          |
| 371163 C   | T          |
| 371181 G   | T          |
| 371201 G   | A          |
| 371209 A   | G          |
| 371217 T   | C          |
| 371319 T   | C          |
| 371336 G   | A          |



|           |    |
|-----------|----|
| 371344 G  | A  |
| 371357 G  | A  |
| 371464 T  | C  |
| 371470 C  | T  |
| 371473 T  | C  |
| 371492 A  | G  |
| 371596 T  | C  |
| 371611 G  | A  |
| 371639 T  | A  |
| 371650 G  | A  |
| 371659 C  | T  |
| 371686 C  | T  |
| 371816 A  | G  |
| 371956 T  | C  |
| 371962 A  | G  |
| 372034 G  | A  |
| 372048 C  | T  |
| 372144 A  | G  |
| 372566 A  | G  |
| 372575 A  | T  |
| 372595 T  | C  |
| 372602 G  | T  |
| 372605 T  | C  |
| 372732 C  | T  |
| 372828 CT | C  |
| 372995 A  | T  |
| 373010 G  | A  |
| 373012 AG | A  |
| 373065 G  | GA |
| 373149 A  | G  |
| 373234 C  | T  |
| 373569 T  | A  |
| 373583 T  | C  |
| 373901 C  | A  |
| 373979 C  | T  |
| 374147 A  | T  |
| 374150 T  | C  |
| 374163 C  | G  |
| 374483 G  | A  |
| 374609 T  | C  |
| 374816 T  | G  |
| 375133 T  | C  |
| 375260 C  | T  |
| 375299 T  | C  |
| 375404 T  | C  |
| 375425 T  | A  |
| 375563 C  | A  |
| 375636 T  | C  |
| 375660 G  | T  |
| 375718 T  | C  |

|          |                           |
|----------|---------------------------|
| 375762 A | C                         |
| 375865 G | A                         |
| 375878 C | G                         |
| 376174 T | C                         |
| 376209 C | T                         |
| 376293 G | A                         |
| 376349 C | T                         |
| 376374 G | A                         |
| 376426 A | G                         |
| 376429 G | A                         |
| 376462 C | T                         |
| 376533 A | C                         |
| 376550 C | T                         |
| 376567 G | C                         |
| 376635 T | C                         |
| 376638 C | T                         |
| 376683 C | T                         |
| 376746 T | G                         |
| 376795 G | A                         |
| 376882 A | G                         |
| 376949 C | T                         |
| 377020 A | G                         |
| 377052 C | T                         |
| 377213 C | A                         |
| 377546 C | T                         |
| 377631 G | A                         |
| 377812 G | A                         |
| 377847 C | T                         |
| 377935 C | T                         |
| 378026 T | C                         |
| 378194 A | ACTGCTGTTGCTGCTGTTGCTGCTG |
| 378720 G | A                         |
| 378757 C | A                         |
| 378767 C | T                         |
| 378861 T | A                         |
| 378888 C | T                         |
| 378990 A | G                         |
| 379083 A | G                         |
| 379115 G | A                         |
| 379116 C | A                         |
| 379307 T | C                         |
| 379764 C | T                         |
| 380053 A | C                         |
| 380614 A | G                         |
| 380662 A | C                         |
| 380701 A | G                         |
| 380785 T | C                         |
| 381223 A | G                         |
| 381920 A | G                         |
| 382080 C | T                         |

|             |    |
|-------------|----|
| 382296 G    | A  |
| 382440 C    | T  |
| 382573 G    | T  |
| 383031 A    | G  |
| 383075 T    | C  |
| 383176 T    | C  |
| 383207 C    | CA |
| 383221 C    | T  |
| 383464 T    | A  |
| 384094 T    | C  |
| 384181 T    | C  |
| 384244 G    | T  |
| 384475 C    | T  |
| 384604 A    | G  |
| 384687 G    | A  |
| 384736 G    | A  |
| 384859 A    | G  |
| 385114 A    | T  |
| 385198 A    | G  |
| 385527 CATG | C  |
| 385565 A    | G  |
| 385789 C    | T  |
| 386029 T    | C  |
| 386037 T    | A  |
| 386062 C    | T  |
| 386554 A    | G  |
| 386660 T    | C  |
| 386934 G    | A  |
| 387058 A    | AT |
| 387111 C    | T  |
| 387165 G    | A  |
| 387189 C    | T  |
| 387206 A    | G  |
| 387211 T    | C  |
| 387232 T    | C  |
| 387291 C    | T  |
| 387326 A    | G  |
| 387373 G    | A  |
| 387395 T    | C  |
| 387418 T    | C  |
| 387476 C    | T  |
| 387527 G    | A  |
| 387587 T    | A  |
| 387668 T    | C  |
| 387755 G    | T  |
| 387758 G    | A  |
| 387789 A    | G  |
| 387891 C    | T  |
| 387915 T    | C  |
| 388398 A    | T  |

|        |   |      |
|--------|---|------|
| 388632 | G | A    |
| 388715 | C | T    |
| 389244 | A | G    |
| 389259 | G | C    |
| 389349 | T | A    |
| 389685 | A | G    |
| 390234 | G | A    |
| 390264 | C | G    |
| 390279 | T | C    |
| 390381 | G | A    |
| 390525 | T | C    |
| 390606 | T | C    |
| 390692 | A | G    |
| 390764 | T | G    |
| 390796 | A | G    |
| 391140 | T | C    |
| 391273 | A | C    |
| 391370 | C | T    |
| 391554 | A | C    |
| 391626 | A | G    |
| 391803 | G | A    |
| 391995 | T | C    |
| 392292 | A | G    |
| 392617 | C | T    |
| 392793 | G | A    |
| 392815 | T | C    |
| 392955 | C | T    |
| 393008 | T | C    |
| 393029 | G | T    |
| 393516 | C | T    |
| 393570 | A | G    |
| 393727 | A | G    |
| 393820 | G | A    |
| 394044 | G | A    |
| 394260 | G | A    |
| 394333 | A | G    |
| 394558 | G | A    |
| 394605 | G | A    |
| 394724 | T | C    |
| 394786 | A | T    |
| 395060 | G | A    |
| 395477 | G | A    |
| 395578 | C | T    |
| 395714 | T | C    |
| 395778 | G | A    |
| 395905 | C | CAAA |
| 395927 | G | C    |
| 396047 | A | G    |
| 396147 | T | C    |
| 396414 | G | T    |

|             |    |
|-------------|----|
| 396486 T    | C  |
| 396513 T    | C  |
| 396838 T    | C  |
| 397128 AT   | A  |
| 397165 A    | G  |
| 397190 C    | T  |
| 397646 A    | T  |
| 397806 G    | T  |
| 398102 G    | A  |
| 398454 G    | T  |
| 398593 A    | G  |
| 399676 G    | T  |
| 400100 T    | C  |
| 400706 G    | A  |
| 400734 T    | C  |
| 401182 C    | T  |
| 401557 T    | C  |
| 401583 G    | A  |
| 401616 C    | T  |
| 401689 C    | CT |
| 401806 T    | G  |
| 402245 G    | A  |
| 402362 T    | C  |
| 402848 A    | G  |
| 402868 T    | C  |
| 402968 A    | T  |
| 403021 C    | T  |
| 403100 T    | A  |
| 403422 A    | G  |
| 403712 A    | C  |
| 403754 G    | A  |
| 403778 A    | G  |
| 404257 C    | T  |
| 404390 T    | A  |
| 404478 C    | T  |
| 405017 C    | T  |
| 405222 T    | A  |
| 405233 A    | G  |
| 405447 G    | A  |
| 405616 G    | T  |
| 405768 T    | C  |
| 406908 C    | T  |
| 407110 CTTT | C  |
| 407326 G    | A  |
| 407424 G    | A  |
| 407445 T    | C  |
| 407448 A    | G  |
| 407449 A    | G  |
| 407531 T    | A  |
| 407630 T    | G  |

|           |    |
|-----------|----|
| 407713 T  | C  |
| 407758 T  | C  |
| 407835 A  | C  |
| 407836 T  | C  |
| 407848 A  | T  |
| 407894 C  | T  |
| 407900 C  | T  |
| 408114 C  | T  |
| 408652 T  | G  |
| 408839 G  | C  |
| 409084 A  | G  |
| 409162 A  | G  |
| 410876 G  | GA |
| 411011 A  | G  |
| 411212 T  | C  |
| 411440 C  | G  |
| 411641 A  | G  |
| 411920 G  | A  |
| 413326 AT | A  |
| 413587 G  | A  |
| 413664 G  | T  |
| 413806 C  | T  |
| 413824 A  | G  |
| 413855 A  | G  |
| 413856 A  | G  |
| 413928 A  | G  |
| 413976 A  | T  |
| 414554 A  | C  |
| 414882 A  | T  |
| 414935 G  | A  |
| 415213 C  | T  |
| 415291 T  | C  |
| 415351 C  | T  |
| 415641 A  | G  |
| 415881 C  | T  |
| 415982 A  | C  |
| 416055 T  | A  |
| 416228 T  | G  |
| 416229 G  | A  |
| 416465 C  | A  |
| 417085 A  | C  |
| 417115 T  | C  |
| 417147 T  | C  |
| 417153 A  | G  |
| 417363 T  | C  |
| 417386 G  | A  |
| 417498 A  | C  |
| 417881 T  | C  |
| 417891 G  | A  |
| 418082 A  | G  |

|          |                                             |
|----------|---------------------------------------------|
| 418481 C | T                                           |
| 419075 G | A                                           |
| 419363 A | G                                           |
| 419439 G | A                                           |
| 419445 A | G                                           |
| 419675 G | A                                           |
| 419777 T | G                                           |
| 420107 G | T                                           |
| 420139 A | G                                           |
| 420202 G | T                                           |
| 420398 A | T                                           |
| 420611 C | T                                           |
| 420746 C | T                                           |
| 420770 C | T                                           |
| 420837 C | T                                           |
| 420850 G | A                                           |
| 420863 T | C                                           |
| 420947 G | A                                           |
| 421003 G | A                                           |
| 421049 A | C                                           |
| 421167 A | C                                           |
| 421190 C | T                                           |
| 421315 A | ATGTTAATCAGATATATGGTAGAAAGCTCTAACTTTTTACCCT |
| 421557 T | C                                           |
| 421569 T | C                                           |
| 421644 C | T                                           |
| 421952 T | A                                           |
| 422163 G | A                                           |
| 422550 T | C                                           |
| 422712 T | C                                           |
| 423142 C | G                                           |
| 423519 C | CA                                          |
| 423887 G | GT                                          |
| 423928 A | G                                           |
| 424199 A | AT                                          |
| 424353 G | A                                           |
| 424980 C | T                                           |
| 425197 C | T                                           |
| 425528 A | G                                           |
| 425592 G | A                                           |
| 425860 G | A                                           |
| 426359 C | G                                           |
| 426462 T | C                                           |
| 426769 G | A                                           |
| 426857 A | C                                           |
| 426874 G | A                                           |
| 426959 G | A                                           |
| 427007 T | C                                           |
| 427038 T | G                                           |
| 427337 G | A                                           |

|           |     |
|-----------|-----|
| 427466 T  | G   |
| 427487 C  | T   |
| 428153 A  | T   |
| 428446 G  | A   |
| 428753 A  | G   |
| 428777 G  | T   |
| 429033 A  | G   |
| 429119 C  | T   |
| 429137 T  | C   |
| 429170 G  | A   |
| 429217 C  | T   |
| 429386 C  | T   |
| 429474 G  | A   |
| 429620 G  | A   |
| 429934 T  | C   |
| 429986 C  | A   |
| 429992 T  | C   |
| 430115 G  | A   |
| 430349 T  | A   |
| 430535 A  | G   |
| 430559 A  | G   |
| 430855 T  | C   |
| 430980 T  | A   |
| 431100 G  | A   |
| 431123 G  | A   |
| 431146 G  | T   |
| 431178 A  | G   |
| 431348 G  | A   |
| 431363 A  | G   |
| 431411 T  | G   |
| 431425 C  | T   |
| 431453 A  | T   |
| 431493 C  | T   |
| 431541 GA | G   |
| 431577 A  | C   |
| 431641 A  | G   |
| 431751 T  | C   |
| 431981 T  | G   |
| 432125 T  | TC  |
| 432566 G  | GA  |
| 432774 G  | A   |
| 434810 C  | T   |
| 436050 T  | A   |
| 436759 T  | C   |
| 438417 A  | T   |
| 438701 C  | G   |
| 438853 T  | TTC |
| 438855 T  | A   |
| 438869 A  | C   |
| 439440 G  | A   |



|          |   |
|----------|---|
| 439470 T | C |
| 441327 G | T |
| 442396 G | A |
| 442728 G | A |
| 442750 A | G |
| 442753 G | T |
| 442954 A | G |
| 443146 G | A |
| 444191 G | A |
| 444642 T | C |
| 449932 C | T |
| 464509 T | C |
| 464515 A | G |
| 464648 T | C |
| 464739 C | T |
| 464839 C | T |
| 465495 T | C |
| 465609 C | T |
| 465663 A | G |
| 465911 T | C |
| 465946 C | T |
| 465979 C | T |
| 466015 A | G |
| 466038 T | C |
| 466054 A | G |
| 466063 T | C |
| 466141 T | A |
| 466307 T | C |
| 466393 A | G |
| 466451 G | T |
| 466501 G | A |
| 466704 G | A |
| 466709 A | G |
| 466720 T | G |
| 466738 C | T |
| 466756 G | A |
| 466833 T | C |
| 466920 A | G |
| 466994 C | T |
| 467009 T | A |
| 467012 G | A |
| 467215 T | C |
| 467465 T | C |
| 467537 C | T |
| 468077 A | G |
| 468146 C | G |
| 468149 G | C |
| 468206 T | C |
| 468276 G | A |
| 468287 T | C |

|           |    |
|-----------|----|
| 468333 C  | T  |
| 505921 C  | T  |
| 514762 T  | G  |
| 540310 C  | T  |
| 540325 A  | G  |
| 540363 A  | G  |
| 540434 C  | T  |
| 540506 G  | A  |
| 540610 C  | T  |
| 540655 G  | T  |
| 541308 T  | C  |
| 541323 A  | G  |
| 541950 C  | T  |
| 541970 T  | TA |
| 542146 T  | A  |
| 542186 G  | A  |
| 542206 A  | G  |
| 542213 G  | A  |
| 542233 G  | A  |
| 542335 C  | T  |
| 542450 T  | A  |
| 543135 G  | A  |
| 543177 A  | G  |
| 543300 A  | G  |
| 543473 A  | C  |
| 543496 C  | T  |
| 543762 A  | G  |
| 543804 G  | C  |
| 543817 T  | C  |
| 543899 T  | C  |
| 544065 T  | G  |
| 544098 G  | A  |
| 544172 C  | T  |
| 544229 C  | T  |
| 544269 G  | A  |
| 544296 C  | A  |
| 544722 T  | C  |
| 544982 A  | G  |
| 545018 A  | T  |
| 545150 G  | C  |
| 545156 G  | A  |
| 545172 TA | T  |
| 545274 G  | T  |
| 545300 C  | T  |
| 545524 A  | T  |
| 545550 C  | T  |
| 545719 T  | C  |
| 545883 A  | G  |
| 545978 A  | C  |
| 545996 C  | T  |

|          |       |
|----------|-------|
| 546491 G | A     |
| 546573 C | T     |
| 546599 T | C     |
| 546791 T | C     |
| 546905 A | G     |
| 547115 C | T     |
| 547150 C | T     |
| 547151 C | T     |
| 547161 C | CTTAT |
| 547444 T | C     |
| 547651 A | T     |
| 547734 T | C     |
| 547945 T | G     |
| 548042 T | C     |
| 548045 A | G     |
| 548047 G | A     |
| 548073 G | C     |
| 548085 T | C     |
| 548215 A | G     |
| 548223 A | G     |
| 548291 G | T     |
| 548294 A | G     |
| 548299 T | C     |
| 548301 G | A     |
| 548307 A | C     |
| 548322 T | C     |
| 548375 T | C     |
| 548605 T | C     |
| 548704 T | A     |
| 548707 G | A     |
| 548708 C | T     |
| 548768 C | T     |
| 548816 C | T     |
| 548834 T | C     |
| 548840 A | G     |
| 548867 T | A     |
| 548908 T | C     |
| 548950 A | G     |
| 548974 T | A     |
| 548991 C | T     |
| 549049 G | A     |
| 549062 A | T     |
| 549119 A | G     |
| 549300 T | A     |
| 549329 C | T     |
| 549338 A | C     |
| 549603 G | A     |
| 549836 T | C     |
| 549844 A | G     |
| 549945 T | C     |

|             |      |
|-------------|------|
| 549994 C    | T    |
| 550227 G    | C    |
| 550482 C    | T    |
| 550676 A    | G    |
| 550922 C    | T    |
| 550929 T    | C    |
| 550961 C    | T    |
| 551033 G    | A    |
| 551092 C    | T    |
| 551150 A    | G    |
| 551201 C    | A    |
| 551240 G    | A    |
| 551291 C    | G    |
| 551405 G    | T    |
| 551459 C    | G    |
| 551501 T    | C    |
| 551727 C    | T    |
| 551762 C    | T    |
| 565747 T    | C    |
| 565790 C    | CA   |
| 567054 C    | T    |
| 567145 G    | A    |
| 567397 A    | G    |
| 568423 TG   | T    |
| 569044 T    | C    |
| 569315 G    | A    |
| 569988 G    | C    |
| 570400 A    | C    |
| 570548 C    | T    |
| 570584 G    | C    |
| 570644 T    | C    |
| 570656 A    | G    |
| 570660 T    | A    |
| 570662 AAAT | A    |
| 571379 GC   | G    |
| 573160 A    | AT   |
| 575501 C    | T    |
| 577340 T    | TA   |
| 577519 T    | TGTG |
| 577526 G    | GGT  |
